# Supplementary material
Source: HighWire-hosted journal article supplement (https://srh.bmj.com/content/49/2/e1)
Supplement: inline-supplementary-material-1 [file inline-supplementary-material-1.pdf]

## Supplementary Materials

Supplemental Table 1. Search Strategy

| Criteria     | Embase 1974 to October 5, 2021<br>(via Ovid.com)                                                                                                                                                                                                                                                                                                                                                                | Ovid MEDLINE ALL 1946–<br>October 5, 2021 (via Ovid.com)                                                                                                                                                  | Ovid EBM Reviews: Cochrane<br>Central Register of Controlled<br>Trials<br>Cochrane Database of<br>Systematic Reviews 2005–<br>October 5, 2021 (via Ovid.com) |
|--------------|-----------------------------------------------------------------------------------------------------------------------------------------------------------------------------------------------------------------------------------------------------------------------------------------------------------------------------------------------------------------------------------------------------------------|-----------------------------------------------------------------------------------------------------------------------------------------------------------------------------------------------------------|--------------------------------------------------------------------------------------------------------------------------------------------------------------|
| Population   | exp puerperium/ or puerperium or<br>postpartum.ti.ab. or exp postpartum/<br>or postpartum or ((iud or iucd or ius)<br>and insertion and (postpartum or<br>puerperium)) or (((iud* adj3<br>insertion) or (iucd* adj3 insertion))<br>and (postpartum or puerperium)) or<br>(((intrauterine device adj3 insertion)<br>or (intrauterine contraceptive device<br>adj3 insertion)) and (postpartum or<br>puerperium)) | exp puerperium/ or exp<br>postpartum period/ or (postpartum<br>and period).mp. or postpartum<br>period.mp. or postpartum.mp. or<br>postpartum.ti.ab. or post<br>partum.ti.ab. or (post and<br>partum).mp. | (puerperium or postpartum or<br>postpartum).ti.ab.kw.                                                                                                        |
| Intervention | exp intrauterine contraceptive<br>device/ OR intrauterine<br>contraceptive device OR (iud OR<br>intrauterine device OR intrauterine<br>contraceptive device OR iucd).ti.ab.                                                                                                                                                                                                                                     | exp Intrauterine Devices/ OR (iud<br>OR intrauterine device OR<br>intrauterine contraceptive device<br>OR iucd).ti.ab.                                                                                    | (iud or intrauterine device or<br>intrauterine contraceptive device<br>or iucd or intrauterine<br>devices).ti.ab.kw.                                         |
| Limits       | (limit to english language AND limit<br>to yr="2020 -Current") NOT<br>(conference abstract or editorial or<br>letter or note).pt.                                                                                                                                                                                                                                                                               | (limit to english language AND<br>limit to yr="2020 -Current")                                                                                                                                            | (limit to english language AND<br>limit to yr="2020 -Current")                                                                                               |

**Supplemental Table 2. Publications Included in the Systematic Literature Review (N=133)**

| First author, publication year   | Study design                | Setting            | Country       | Time period       | Primary aim                  | Age inclusion criteria | Subgroup                              | Total sample size |
|----------------------------------|-----------------------------|--------------------|---------------|-------------------|------------------------------|------------------------|---------------------------------------|-------------------|
| <b>Higher-income group: High</b> |                             |                    |               |                   |                              |                        |                                       |                   |
| Boydell, 2020                    | Cross-sectional             | Multicenter (n=2)  | UK (Scotland) | Jul 2017–Sep 2018 | Clinical outcomes            | Any age                | Overall                               | 35                |
| Braniff, 2015                    | RCT                         | Single center      | Australia     | Jan 2011–Dec 2012 | Insertion time               | Any age                | Insertion time: 10 min vs 6 wks       | 44                |
| Chen, 2010                       | RCT                         | Single center      | US            | May 2007–Oct 2008 | Insertion time               | Adult                  | Insertion time: 10 min vs 6–8 wks     | 102               |
| Cohen, 2016                      | Prospective observational   | Single center      | US            | Jan 2010–Dec 2011 | Effectiveness                | Adolescent             | Overall                               | 82                |
| Cole, 2019                       | Retrospective               | Single center      | US            | Oct 2016–Mar 2017 | Insertion technique/provider | Any age                | Overall                               | 116               |
| Colwill, 2018                    | Retrospective               | Single center      | US            | Apr 2014–Mar 2015 | Clinical outcomes            | Any age                | Delivery type: VD vs CS               | 210               |
| Cooper, 2020                     | Non-randomized intervention | Multicenter (n=2)  | UK (Scotland) | Jan 2017–May 2019 | Patient satisfaction         | Any age                | Overall                               | 379               |
| Dahlke, 2011                     | RCT                         | Single center      | US            | Jan 2009–Dec 2013 | Insertion time               | Any age                | Insertion time: 10 min vs 10 min–48 h | 30                |
| Eggebroten, 2017                 | Prospective observational   | Single center      | US            | Oct 2013–Feb 2016 | Utilization                  | Adult                  | IUD type: Hormonal vs copper          | 211               |
| Gallagher, 2019                  | Cross-sectional             | Multicenter (n=NR) | UK (Scotland) | NR                | Promotion                    | Adolescent             | Overall                               | 195               |
| Goldthwaite, 2017                | Prospective observational   | Multicenter (n=2)  | US            | May 2014–Aug 2015 | Insertion technique/provider | Any age                | IUD type: Hormonal vs copper          | 123               |
| Gonzalez, 2020                   | Prospective observational   | Multicenter (n=2)  | US            | Dec 2013–Jun 2017 | Clinical outcomes            | Adult                  | Overall                               | 93                |
| Gurney, 2018                     | Prospective observational   | Single center      | US            | Apr 2015–Feb 2017 | Clinical outcomes            | Adult                  | Overall                               | 200               |
| Gurney, 2020                     | Prospective observational   | Single center      | US            | Jan 2016–Feb 2018 | Clinical outcomes            | Adult                  | Delivery type: Cesarean               | 109               |
| Heller, 2017                     | Non-randomized intervention | Multicenter (n=2)  | UK (Scotland) | Jul 2015–Mar 2016 | Promotion                    | Any age                | Overall                               | 877               |
| Hinz, 2019                       | Prospective observational   | Single center      | US            | Aug 2016–Jan 2018 | Clinical outcomes            | Any age                | IUD type: Hormonal vs copper          | 114               |
| Jatlaoui, 2014                   | Prospective observational   | Single center      | US            | Mar 2009–Mar 2011 | Insertion technique/provider | Adult                  | Overall                               | 99                |
| Levi, 2012                       | Prospective observational   | Multicenter (n=2)  | US            | Oct 2008–Nov 2009 | Clinical outcomes            | Any age                | Overall                               | 90                |
| Levi, 2015                       | RCT                         | Single center      | US            | Mar 2012–Jun 2014 | Utilization                  | Adult                  | Overall                               | 112               |
| Moniz, 2019                      | Retrospective               | Claims database    | US            | Jan 2013–Dec 2016 | Utilization                  | Any age                | Overall                               | 396,073           |

|                                          |                             |                                                          |           |                    |                              |            |                                                |         |
|------------------------------------------|-----------------------------|----------------------------------------------------------|-----------|--------------------|------------------------------|------------|------------------------------------------------|---------|
| Ritter, 2021                             | Retrospective               | Multicenter (n=4,200) The Kids' Inpatient Database, HCUP | US        | 2016               | Utilization                  | Adolescent | Overall                                        | 87,193  |
| Sinkey, 2021                             | Retrospective               | Single center                                            | US        | Mar 2015–Jun 2019  | Utilization                  | Any age    | Comorbidity: Heart disease                     | 159     |
| Soon, 2018                               | RCT                         | Single center                                            | US        | Nov 2013–Jun 2015  | Insertion time               | Adolescent | Overall                                        | 12      |
| Smith, 2021                              | Cross-sectional             | Multicenter (n=NR)                                       | US        | Jan 2015–Dec 2017  | Utilization                  | Any age    | Overall                                        | 700     |
| Stuart, 2015                             | RCT                         | Single center                                            | US        | Mar 2012–Jun 2013  | Clinical outcomes            | Any age    | Overall                                        | 17      |
| Turok, 2017                              | RCT                         | Multicenter (n=2)                                        | US        | Feb 2014–Mar 2016  | Clinical outcomes            | Adult      | Overall                                        | 319     |
| Wallace Huff, 2021                       | Prospective observational   | Single center                                            | US        | Oct–Dec 2015       | Patient satisfaction         | Adult      | Overall                                        | 199     |
| Whitaker, 2014                           | RCT                         | Single center                                            | US        | May 2007–Jan 2011  | Insertion time               | Adult      | Overall                                        | 42      |
| Whiteman, 2012                           | Retrospective               | Claims database                                          | US        | Jan 2001– Dec 2008 | Utilization                  | Any age    | Overall                                        | 920     |
| Woo, 2015                                | Prospective observational   | Single center                                            | US        | Jan 2011–Aug 2012  | Patient satisfaction         | Any age    | Overall                                        | 133     |
| Wu, 2020                                 | Retrospective               | Single center                                            | US        | Jan 2015–Jun 2016  | Effectiveness                | Any age    | Overall                                        | 9,561   |
| <b>Higher-income group: Upper middle</b> |                             |                                                          |           |                    |                              |            |                                                |         |
| Ariadi, 2017                             | Prospective observational   | Multicenter (n=3)                                        | Indonesia | Apr 2014–Jul 2014  | Insertion technique/provider | Any age    | Insertion technique: Sutured vs non-sutured CS | 88      |
| Çelen, 2011                              | Non-randomized intervention | Single center                                            | Turkey    | Sep 2006–Dec 2008  | Effectiveness                | Any age    | Overall                                        | 245     |
| da Silva, 2020                           | Cross-sectional             | Single center                                            | Brazil    | Jan 2018–Jun 2018  | Utilization                  | Any age    | Vulnerable women                               | 184     |
| da Silva Nobrega, 2021                   | Non-randomized intervention | Single center                                            | Brazil    | Feb 2017–Dec 2018  | Clinical outcomes            | Any age    | Overall                                        | 997     |
| Eser, 2018                               | Non-randomized intervention | Single center                                            | Turkey    | NR                 | Insertion technique/provider | Any age    | Overall                                        | 100     |
| Gunardi, 2021                            | Prospective observational   | Single center                                            | Indonesia | Apr 2018–Mar 2019  | Clinical outcomes            | Any age    | Overall                                        | 94      |
| Hochmuller, 2020                         | Prospective observational   | Multicenter (n=NR)                                       | Brazil    | Jun 2018–Sep 2019  | Clinical outcomes            | Adult      | Overall                                        | 124     |
| Kestler, 2011                            | Prospective observational   | Multicenter (n=34)                                       | Guatemala | Mar 2006–Dec 2008  | Utilization                  | Any age    | Delivery type: VD vs CS                        | 218,656 |
| Laporte, 2020                            | RCT                         | Single center                                            | Brazil    | May 2018–May 2019  | Clinical outcomes            | Adult      | IUD type: Hormonal vs copper                   | 140     |
| Marangoni, 2021                          | RCT                         | Single center                                            | Brazil    | May 2018–May 2020  | Clinical outcomes            | Adult      | Overall                                        | 140     |

|                                         |                             |                   |              |                   |                                       |         |                                                                  |        |
|-----------------------------------------|-----------------------------|-------------------|--------------|-------------------|---------------------------------------|---------|------------------------------------------------------------------|--------|
| Singata-Madliki                         | RCT                         | Multicenter (n=2) | South Africa | Dec 2012–Mar 2013 | Clinical outcomes                     | Adult   | Overall                                                          | 123    |
| Sucak, 2015                             | Non-randomized intervention | Single center     | Turkey       | Jan 2009–Jun 2012 | Clinical outcomes                     | Any age | Delivery type: VD vs CS (planned vs emergency)                   | 160    |
| Trigueiro, 2021                         | Retrospective               | Single center     | Brazil       | Aug 2016–Aug 2017 | Insertion training/technique/provider | Any age | Overall                                                          | 828    |
| Unal 2018                               | RCT                         | Single center     | Turkey       | Jun 2016–Jun 2017 | Insertion technique/provider          | Any age | Insertion technique: IUD inserter vs sponge-holding forceps      | 140    |
| Zaconeta, 2019                          | Prospective observational   | Single center     | Brazil       | Feb 2012–Jun 2013 | Clinical outcomes                     | Adult   | Overall                                                          | 100    |
| <b>Lower-income group: Lower-middle</b> |                             |                   |              |                   |                                       |         |                                                                  |        |
| Abro 2018                               | Non-randomized intervention | Single center     | Pakistan     | Jan 2016–Jan 2017 | Effectiveness                         | 20–45   | Overall                                                          | 220    |
| Agarwal, 2017                           | RCT                         | Single center     | India        | Jun 2015–Nov 2015 | Effectiveness                         | Adult   | IUD type: Copper vs CuT380A                                      | 100    |
| Agrawal, 2021                           | Non-randomized intervention | Single center     | India        | Mar 2019–Nov 2020 | Promotion                             | Any age | Overall                                                          | NR     |
| Akram, 2018                             | Non-randomized intervention | Single center     | Pakistan     | Jan 2017–Jun 2018 | Clinical outcomes                     | Any age | Overall                                                          | 100    |
| Alam, 2014                              | Prospective observational   | Single center     | Pakistan     | Nov 2011–Nov 2012 | Clinical outcomes                     | Adult   | Overall                                                          | 100    |
| Bayoumi, 2020                           | RCT                         | Single center     | Egypt        | Feb 2016–Dec 2018 | Clinical outcomes                     | Adult   | Overall                                                          | 500    |
| Bhadra 2018                             | Prospective observational   | Single center     | India        | May 2015–Oct 2017 | Insertion technique/provider          | Any age | Overall                                                          | 19,170 |
| Bhat 2016                               | Non-randomized intervention | Single center     | India        | Jun 2011–May 2014 | Utilization                           | Any age | Insertion time: 10 min vs 10 min–48 h<br>Delivery type: VD vs CS | 680    |
| Bhutta, 2011                            | Cross-sectional             | Single center     | Pakistan     | Nov 2006–Oct 2007 | Clinical outcomes                     | Any age | Delivery type: CS                                                | 50     |
| Blumenthal 2018                         | RCT                         | Multicenter (n=5) | India        | Sep 2015–Jul 2016 | Insertion technique/provider          | Any age | Insertion technique: PPIUD inserter vs Kelly's forceps           | 480    |
| Blumenthal, 2016                        | Prospective observational   | Single center     | Zambia       | Jul 2010–Nov 2010 | Patient satisfaction                  | Any age | Insertion time: 15 min vs 15 min–48 h                            | 305    |
| Butt, 2020                              | Prospective observational   | Single center     | Pakistan     | Sep 2016–Sep 2018 | Clinical outcomes                     | Any age | Overall                                                          | 324    |
| Chakheni, 2017                          | Non-randomized intervention | Single center     | India        | Jan 2013–Dec 2014 | Insertion technique/provider          | Any age | Insertion technique: Kelly's forceps vs manually                 | 100    |

|                  |                             |                    |            |                     |                              |         |                                                                  |         |
|------------------|-----------------------------|--------------------|------------|---------------------|------------------------------|---------|------------------------------------------------------------------|---------|
| Dasanayake, 2020 | Retrospective               | Single center      | Sri Lanka  | Jan 2014–Dec 2019   | Promotion                    | Any age | Overall                                                          | 14,051  |
| Dewan, 2019      | Retrospective               | Single center      | India      | Jan 2010–Dec 2017   | Utilization                  | Any age | Insertion time: 10 min–48 h vs 6 wks                             | 208,210 |
| Dewan, 2017      | Non-randomized intervention | Single center      | India      | Jan 2013–Feb 2013   | Clinical outcomes            | Adult   | Delivery type: VD vs CS                                          | 348     |
| Dias, 2016       | Prospective observational   | Single center      | Sri Lanka  | Dec 2012–Apr 2013   | Insertion technique/provider | Any age | Delivery type: VD vs CS                                          | 91      |
| Divakar, 2019    | Non-randomized intervention | Multicenter (n=6)  | India      | Mar 2015–Mar 2017   | Promotion                    | Any age | Overall                                                          | 66,508  |
| El Beltagy, 2011 | RCT                         | Single center      | Egypt      | NR                  | Clinical outcomes            | Any age | IUD type: Hormonal vs copper                                     | 300     |
| Elsedeek, 2012   | Non-randomized intervention | Multicenter (n=3)  | Egypt      | Jan 2007–Jan 2009   | Clinical outcomes            | 30–40   | IUD type: Hormonal vs copper                                     | 140     |
| Elsedeek, 2015   | Non-randomized intervention | Single center      | Egypt      | Mar 2006–Dec 2011   | Promotion                    | Any age | IUD type: Hormonal vs copper                                     | 143     |
| Elshamy, 2021    | Non-randomized intervention | Single center      | Egypt      | Jan 2018–Dec 2019   | Clinical outcomes            | Any age | IUD type: Hormonal vs copper                                     | 1,100   |
| Eluwa 2016       | Cross-sectional             | Multicenter (n=11) | Nigeria    | May 2014–Feb 2015   | Utilization                  | Any age | Insertion technique: Kelly's forceps vs manually                 | 728     |
| Fatema, 2018     | Non-randomized intervention | Single center      | Bangladesh | Jan 2013–Jun 2013   | Utilization                  | Any age | Overall                                                          | 370     |
| Fatima 2018      | Non-randomized intervention | Multicenter (n=6)  | Bangladesh | Feb 2017–Dec 2017   | Insertion technique/provider | Any age | Insertion technique: Pre vs post-insertion training              | 16,359  |
| Ghafoor, 2020    | Cross-sectional             | Single center      | Pakistan   | Jan 2019–Dec 2019   | Overall                      | Adult   | Overall                                                          | 108     |
| Gueye, 2013      | Non-randomized intervention | Single center      | Senegal    | Feb 15–Nov 15, 2012 | Insertion technique/provider | Any age | Overall                                                          | 59      |
| Gupta, 2014      | Prospective observational   | Single center      | India      | Sep 2011–Feb 2013   | Insertion technique/provider | Any age | Overall                                                          | 100     |
| Gupta, 2015      | Non-randomized intervention | Single center      | India      | May 2013–Apr 2014   | Clinical outcomes            | Any age | Overall                                                          | 150     |
| Gupta, 2018      | Retrospective               | Single center      | India      | Jul 2013–Jul 2014   | Clinical outcomes            | Any age | Insertion time: 10 min vs 10 min–48 h<br>Delivery type: VD vs CS | 1,416   |
| Habib, 2020      | Retrospective               | Single center      | Pakistan   | Sep 2019–Jul 2020   | Clinical outcomes            | Adult   | VD vs CS                                                         | 120     |
| Halder 2016      | Non-randomized intervention | Single center      | India      | Apr 2012–Mar 2013   | Utilization                  | Any age | Insertion time: 10 min vs 10 min–48 h                            | 200     |

|                  |                                                                                                                                                                           |                    |                                                      |                                         |                      |         |                                                                        |         |
|------------------|---------------------------------------------------------------------------------------------------------------------------------------------------------------------------|--------------------|------------------------------------------------------|-----------------------------------------|----------------------|---------|------------------------------------------------------------------------|---------|
|                  |                                                                                                                                                                           |                    |                                                      |                                         |                      |         | Delivery type:<br>VD vs CS                                             |         |
| Harani, 2019     | Prospective observational                                                                                                                                                 | Single center      | India                                                | Sep 2017–Dec 2017                       | Clinical outcomes    | Any age | Delivery type:<br>VD vs CS                                             | 254     |
| Hooda, 2016      | Non-randomized intervention                                                                                                                                               | Single center      | India                                                | NR                                      | Clinical outcomes    | Any age | Overall                                                                | 593     |
| Huber-Krum, 2020 | RCT<br>Note: Hospitals were randomized to initiate PPIUD counseling intervention after 3 months of baseline data collection or after 9 months of baseline data collection | Multicenter (n=6)  | Nepal                                                | May 2016–Apr 2018 and Mar 2017–Dec 2018 | Promotion            | Any age | Overall                                                                | 69,210  |
| Ifitikhar, 2019  | Prospective observational                                                                                                                                                 | Single center      | Pakistan                                             | Mar 2016–Feb 2019                       | Patient satisfaction | Any age | Overall                                                                | 372     |
| Jairaj, 2016     | Non-randomized intervention                                                                                                                                               | Single center      | India                                                | Jan 2015–Mar 2015                       | Utilization          | Any age | Overall                                                                | 370     |
| Jakhar, 2019     | Prospective observational                                                                                                                                                 | Single center      | India                                                | Jan 2013–May 2014                       | Effectiveness        | Adult   | Overall                                                                | 200     |
| Kant, 2016       | Retrospective                                                                                                                                                             | Multicenter (n=2)  | India                                                | May 2014–Dec 2014                       | Utilization          | Any age | Overall                                                                | 611     |
| Karra, 2017      | Cross-sectional                                                                                                                                                           | Multicenter (n=NR) | Sri Lanka                                            | Jan 2015–May 2015                       | Promotion            | Any age | Overall                                                                | 13,731  |
| Khan, 2018       | Non-randomized intervention                                                                                                                                               | Single center      | Pakistan                                             | Apr 2017–Jun 2018                       | Clinical outcomes    | Any age | Delivery type:<br>VD vs CS                                             | 500     |
| Khan, 2020       | RCT                                                                                                                                                                       | Single center      | Pakistan                                             | Jun 2019–Feb 2020                       | Clinical outcomes    | Adult   | Delivery type:<br>VD vs CS                                             | 152     |
| Khurshid, 2020   | Prospective observational                                                                                                                                                 | Single center      | India                                                | Mar 2015–Nov 2016                       | Clinical outcomes    | Any age | Insertion time:<br>10 min–48 h vs<br>6 wks                             | 511     |
| Kumar, 2014      | Prospective observational                                                                                                                                                 | Multicenter (n=16) | India                                                | Jan 2011–Dec 2012                       | Patient satisfaction | Any age | Overall                                                                | 2,733   |
| Kumar, 2019      | Retrospective                                                                                                                                                             | Multicenter (n=12) | India                                                | Nov 2015–Dec 2015                       | Promotion            | Any age | Insertion time:<br>10 min vs 10 min–48 h<br>Delivery type:<br>VD vs CS | 844     |
| Lerma, 2020      | Cross-sectional                                                                                                                                                           | Multicenter (n=5)  | India                                                | May 2015–Jul 2016                       | Insertion time       | Any age | Insertion time:<br>10 min vs 10 min–48 h                               | 560     |
| Makins 2018      | Non-randomized intervention                                                                                                                                               | Multicenter (n=48) | Sri Lanka, India, Nepal, Bangladesh, Tanzania, Kenya | May 2014–Sep 2017                       | Clinical outcomes    | Any age | Overall                                                                | 725,647 |
| Mani, 2018       | Prospective observational                                                                                                                                                 | Single center      | India                                                | NR                                      | Utilization          | Any age | Insertion time:<br>10 min vs 10 min–48 h                               | 200     |

|                   |                             |                     |             |                          |                                       |         |                         |         |
|-------------------|-----------------------------|---------------------|-------------|--------------------------|---------------------------------------|---------|-------------------------|---------|
| Mishra, 2014      | Non-randomized intervention | Single center       | India       | Jan 2012–Jun 2013        | Utilization                           | Adult   | Overall                 | 564     |
| Mishra, 2017      | Retrospective               | Single center       | India       | Jan 2010–Dec 2012        | Clinical outcomes                     | Any age | Delivery type: VD vs CS | 736     |
| Muganyizi, 2018   | Prospective observational   | Multicenter (n=6)   | Tanzania    | Dec 2016–Oct 2017        | Insertion technique/provider          | Any age | Overall                 | 40,470  |
| Ndegwa, 2014      | RCT                         | Single center       | Kenya       | NR                       | Promotion                             | Any age | Overall                 | 127     |
| N'Guessan, 2020   | Retrospective               | Single center       | Ivory Coast | Jan 2016–Mar 2017        | Clinical outcomes                     | Any age | Overall                 | 128     |
| Nigam 2018        | Non-randomized intervention | Single center       | India       | Jan 2013–Dec 2013        | Promotion                             | Any age | Overall                 | 550     |
| Nisar, 2020       | Retrospective               | Single center       | Pakistan    | Aug 2014–Jul 2016        | Clinical outcomes                     | Any age | Overall                 | 8,003   |
| Pradhan, 2019     | RCT                         | Multicenter (n=6)   | Nepal       | Sep 2015–Mar 2017        | Promotion                             | Any age | Overall                 | 15,607  |
| Prager, 2012      | Non-randomized intervention | Single center       | Zambia      | Feb 2009–Feb 2009        | Insertion technique/provider          | Any age | Overall                 | 38      |
| Puri, 2020        | RCT                         | Multicenter (n=6)   | Nepal       | Sep 2015–Mar 2017        | Clinical outcomes                     | Any age | Overall                 | 75,571  |
| Qazi, 2020        | Prospective observational   | Single center       | Pakistan    | Oct 2018–Sep 2019        | Clinical outcomes                     | Adult   | Overall                 | 6,283   |
| Rani, 2015        | Non-randomized intervention | Single center       | India       | NR                       | Clinical outcomes                     | Any age | Overall                 | 99      |
| Rwegoshora, 2020  | Non-randomized intervention | Multicenter (n=6)   | Tanzania    | Dec 2017–Apr 2018        | Clinical outcomes                     | Any age | Overall                 | 20,276  |
| Shukla, 2012      | Prospective observational   | Single center       | India       | Jan 1995–Dec 2000        | Effectiveness                         | Any age | Overall                 | 1,317   |
| Singal, 2014      | Prospective observational   | Single center       | India       | Jul 2012–Dec 2012        | Clinical outcomes                     | Any age | Overall                 | 300     |
| Singal, 2021      | Cross-sectional             | Multicenter (n=20)  | India       | Feb–Mar and Nov–Dec 2019 | Utilization                           | Any age | Overall                 | 4,012   |
| Singh 2016        | Non-randomized intervention | Multicenter (n=2)   | India       | Mar 2015–Jul 2015        | Insertion technique/provider          | Any age | Overall                 | 80      |
| Singh, 2021       | Prospective observational   | Single center       | India       | Oct 2018–Mar 2019        | Insertion training/technique/provider | Any age | Overall                 | 593     |
| Sodje, 2016       | Prospective observational   | Multicenter (n=8)   | Nigeria     | Jun 2014–May 2015        | Utilization                           | Any age | Overall                 | 374     |
| Thapa, 2020       | Cross-sectional             | Multicenter (n=7)   | Nepal       | Oct 2018–Mar 2019        | Utilization                           | Any age | Overall                 | 29,072  |
| Vishwakarma, 2020 | Non-randomized intervention | Single center       | India       | Nov 2016–Oct 2019        | Clinical outcomes                     | Adults  | Overall                 | 1,029   |
| Wasim, 2018       | Non-randomized intervention | Single center       | Pakistan    | Aug 2015–Jan 2017        | Effectiveness                         | Any age | Delivery type: VD vs CS | 3,012   |
| Weerasekera 2018  | Non-randomized intervention | Multicenter (n=NR)  | Sri Lanka   | May 2014–Sep 2017        | Promotion                             | Any age | Overall                 | 184,433 |
| Yadav, 2016       | Cross-sectional             | Multicenter (n=137) | India       | Jan 2013–Dec 2013        | Clinical outcomes                     | Any age | Overall                 | 28,688  |
| Yadav, 2020       | Retrospective               | Single center       | India       | Jan 2013–Oct 2019        | Promotion                             | Any age | Overall                 | 20,418  |

|                                                  |                             |                    |                                                                    |                   |                   |         |                                      |                                             |
|--------------------------------------------------|-----------------------------|--------------------|--------------------------------------------------------------------|-------------------|-------------------|---------|--------------------------------------|---------------------------------------------|
| Zaman, 2020                                      | Non-randomized intervention | Single center      | Pakistan                                                           | Jan 2015–Dec 2015 | Clinical outcomes | Any age | Overall                              | 140                                         |
| <b>Lower-income group: Lower-middle and high</b> |                             |                    |                                                                    |                   |                   |         |                                      |                                             |
| Ragab, 2015                                      | RCT                         | Multicenter (n=3)  | Egypt and Saudi Arabia                                             | Jan 2013–Jun 2014 | Clinical outcomes | Any age | Overall                              | 120                                         |
| <b>Lower-income group: Lower-middle and low</b>  |                             |                    |                                                                    |                   |                   |         |                                      |                                             |
| Pfizer, 2015                                     | Cross-sectional             | Multicenter (n=NR) | India, Pakistan, Philippines, Rwanda, Guinea, Ethiopia             | Feb 2010–Jul 2013 | Promotion         | Any age | Overall                              | 1,873,370                                   |
| Pleah 2016                                       | Cross-sectional             | Multicenter (n=5)  | Benin, Ivory Coast, Niger, Senegal, Togo (West and Central Africa) | Jan 2014–Dec 2015 | Promotion         | Any age | Overall                              | 15,394                                      |
| <b>Lower-income group: Low</b>                   |                             |                    |                                                                    |                   |                   |         |                                      |                                             |
| Bryant, 2013                                     | RCT                         | Single center      | Malawi                                                             | Oct 2010–Feb 2011 | Utilization       | Adult   | Insertion time: 10 min–48 h vs 6 wks | 49                                          |
| Espey, 2021                                      | Non-randomized intervention | Multicenter (n=6)  | Rwanda                                                             | Aug 2017–Oct 2018 | Promotion         | Any age | Overall                              | 12,068                                      |
| Geda, 2021                                       | Cross-sectional             | Multicenter (n=13) | Ethiopia                                                           | Aug–Sep 2019      | Utilization       | Any age | Overall                              | 286                                         |
| Ingabire, 2018                                   | Non-randomized intervention | Multicenter (n=2)  | Rwanda                                                             | Aug 2017–Jul 2018 | Promotion         | Any age | Overall                              | 9,020                                       |
| Kanakuze, 2020                                   | Cross-sectional             | Single center      | Rwanda                                                             | Jan 2019–Feb 2019 | Utilization       | Any age | Overall                              | 383                                         |
| Lester, 2015                                     | RCT                         | Single center      | Uganda                                                             | Feb 2011–Dec 2011 | Insertion time    | Adult   | Insertion time: 10 min vs 6 wks      | 68                                          |
| Melkie, 2021                                     | Cross-sectional             | Multicenter (n=4)  | Ethiopia                                                           | Jan–Mar 2019      | Utilization       | Any age | Overall                              | 423                                         |
| Ngonzi, 2021                                     | Prospective observational   | Single center      | Uganda                                                             | Sep 2014–Jan 2015 | Clinical outcomes | Any age | Overall                              | 167                                         |
| Omona, 2020                                      | Retrospective               | Single center      | Uganda                                                             | Jul 2018–Aug 2018 | Utilization       | Any age | Overall                              | 202                                         |
| Wayessa, 2020                                    | Non-randomized intervention | Multicenter (n=NR) | Ethiopia                                                           | Apr 2017–May 2017 | Promotion         | Any age | Overall                              | 471 (intervention)<br>237 (nonintervention) |

Key: CS – Cesarean section; HCUP – Healthcare Cost and Utilization Project; NR – not reported; PPIUD – postpartum intrauterine device; RCT – randomized controlled trial; UK – United Kingdom; US – United States; VD – vaginal delivery; wks – weeks.



**Supplement Table 3a. Newcastle-Ottawa Scale (NOS) for quality of prospective observational studies**

Wells GA, Shea B, O'Connell D, et al. The Newcastle-Ottawa (NOS) for assessing the quality of nonrandomized studies in meta-analyses. [http://www.ohri.ca/promas/clinical\\_epidemiology/oxford.asp](http://www.ohri.ca/promas/clinical_epidemiology/oxford.asp)

| First Author, year | Selection                                |                                     |                           |                                                                          | Comparability                                                   | Outcome               |                                                  |                                  | Overall quality                   |                                              |
|--------------------|------------------------------------------|-------------------------------------|---------------------------|--------------------------------------------------------------------------|-----------------------------------------------------------------|-----------------------|--------------------------------------------------|----------------------------------|-----------------------------------|----------------------------------------------|
|                    | Representativeness of the exposed cohort | Selection of the non-exposed cohort | Ascertainment of exposure | Demonstration that outcome of interest was not present at start of study | Comparability of cohorts on the basis of the design or analysis | Assessment of outcome | Was follow-up long enough for outcomes to occur? | Adequacy of follow up of cohorts | Score: number of * or NA of 8 (%) | Good: 70%-100%<br>Fair: 50%-69%<br>Low: <50% |
| Alam, 2014         |                                          |                                     |                           |                                                                          |                                                                 |                       |                                                  |                                  | 88%                               | Good                                         |
| Ariadi, 2017       |                                          |                                     |                           |                                                                          |                                                                 |                       |                                                  |                                  | 100%                              | Good                                         |
| Bhadra, 2018       |                                          |                                     |                           |                                                                          |                                                                 |                       |                                                  |                                  | 75%                               | Good                                         |
| Blumenthal, 2016   |                                          |                                     |                           |                                                                          |                                                                 |                       |                                                  |                                  | 75%                               | Good                                         |
| Butt, 2020         |                                          |                                     |                           |                                                                          |                                                                 |                       |                                                  |                                  | 63%                               | Fair                                         |
| Cohen, 2016        |                                          |                                     |                           |                                                                          |                                                                 |                       |                                                  |                                  | 100%                              | Good                                         |
| Dias, 2015         |                                          |                                     |                           |                                                                          |                                                                 |                       |                                                  |                                  | 100%                              | Good                                         |
| Eggebroten, 2017   |                                          |                                     |                           |                                                                          |                                                                 |                       |                                                  |                                  | 88%                               | Good                                         |
| Goldthwaite, 2017  |                                          |                                     |                           |                                                                          |                                                                 |                       |                                                  |                                  | 88%                               | Good                                         |
| Gonzalez, 2020     |                                          |                                     |                           |                                                                          |                                                                 |                       |                                                  |                                  | 75%                               | Fair                                         |
| Gunardi, 2021      |                                          |                                     |                           |                                                                          |                                                                 |                       |                                                  |                                  | 75%                               | Good                                         |
| Gupta, 2014        |                                          |                                     |                           |                                                                          |                                                                 |                       |                                                  |                                  | 100%                              | Good                                         |
| Gurney, 2018       |                                          |                                     |                           |                                                                          |                                                                 |                       |                                                  |                                  | 100%                              | Good                                         |
| Gurney, 2020       |                                          |                                     |                           |                                                                          |                                                                 |                       |                                                  |                                  | 75%                               | Good                                         |
| Harani 2019        |                                          |                                     |                           |                                                                          |                                                                 |                       |                                                  |                                  | 100%                              | Good                                         |
| Hinz, 2019         |                                          |                                     |                           |                                                                          |                                                                 |                       |                                                  |                                  | 88%                               | Good                                         |
| Hochmuller, 2020   |                                          |                                     |                           |                                                                          |                                                                 |                       |                                                  |                                  | 88%                               | Good                                         |
| Iftikhar, 2019     |                                          |                                     |                           |                                                                          |                                                                 |                       |                                                  |                                  | 88%                               | Good                                         |
| Jakhar 2019        |                                          |                                     |                           |                                                                          |                                                                 |                       |                                                  |                                  | 75%                               | Good                                         |
| Jatlaoui, 2014     |                                          |                                     |                           |                                                                          |                                                                 |                       |                                                  |                                  | 88%                               | Good                                         |
| Kestler, 2011      |                                          |                                     |                           |                                                                          |                                                                 |                       |                                                  |                                  | 75%                               | Good                                         |
| Khurshid 2020      |                                          |                                     |                           |                                                                          |                                                                 |                       |                                                  |                                  | 75%                               | Good                                         |
| Kumar, 2014        |                                          |                                     |                           |                                                                          |                                                                 |                       |                                                  |                                  | 75%                               | Good                                         |
| Levi, 2012         |                                          |                                     |                           |                                                                          |                                                                 |                       |                                                  |                                  | 75%                               | Good                                         |
| Mani, 2018         |                                          |                                     |                           |                                                                          |                                                                 |                       |                                                  |                                  | 88%                               | Good                                         |
| Muganyizi, 2018    |                                          |                                     |                           |                                                                          |                                                                 |                       |                                                  |                                  | 88%                               | Good                                         |
| Ngonzi, 2021       |                                          |                                     |                           |                                                                          |                                                                 |                       |                                                  |                                  | 75%                               | Good                                         |
| Qazi, 2020         |                                          |                                     |                           |                                                                          |                                                                 |                       |                                                  |                                  | 88%                               | Good                                         |
| Shukla, 2012       |                                          |                                     |                           |                                                                          |                                                                 |                       |                                                  |                                  | 88%                               | Good                                         |
| Singal, 2014       |                                          |                                     |                           |                                                                          |                                                                 |                       |                                                  |                                  | 88%                               | Good                                         |
| Singh, 2021        |                                          |                                     |                           |                                                                          |                                                                 |                       |                                                  |                                  | 75%                               | Good                                         |
| Sodje, 2016        |                                          |                                     |                           |                                                                          |                                                                 |                       |                                                  |                                  | 100%                              | Good                                         |
| Wallace Huff, 2021 |                                          |                                     |                           |                                                                          |                                                                 |                       |                                                  |                                  | 75%                               | Good                                         |
| Woo, 2015          |                                          |                                     |                           |                                                                          |                                                                 |                       |                                                  |                                  | 75%                               | Good                                         |
| Zaconeta 2019      |                                          |                                     |                           |                                                                          |                                                                 |                       |                                                  |                                  | 100%                              | Good                                         |

| Key: NOS QA criteria table |                                     |
|----------------------------|-------------------------------------|
|                            | Meets good quality criteria         |
|                            | Criteria not applicable (NA)        |
|                            | Does not meet good quality criteria |

**Supplement Table 3b. Motheral (ISPOR) tool for Retrospective studies**

Motheral B, Brooks J, Clark MA, et al. A checklist for retrospective database studies--report of the ISPOR Task Force on Retrospective Databases. Value Health. 2003;6(2):90-97.

| First Author, year | Data Sources |                          |          |             | Methods: Research Design |                  |                             |                  | Methods: Study Population and Variable Definitions |             |           |                         |                     |                   |               |                 |                    |
|--------------------|--------------|--------------------------|----------|-------------|--------------------------|------------------|-----------------------------|------------------|----------------------------------------------------|-------------|-----------|-------------------------|---------------------|-------------------|---------------|-----------------|--------------------|
|                    | Relevance    | Reliability and Validity | Linkages | Eligibility | Data analysis plan       | Design selection | Research design limitations | Treatment effect | Sample selection                                   | Eligibility | Censoring | Operational definitions | Definition validity | Timing of outcome | Event capture | Disease history | Resource valuation |
| Allison 2021       |              |                          |          |             |                          |                  |                             |                  |                                                    |             |           |                         |                     |                   |               |                 |                    |
| Cole, 2019         |              |                          |          |             |                          |                  |                             |                  |                                                    |             |           |                         |                     |                   |               |                 |                    |
| Cowill, 2018       |              |                          |          |             |                          |                  |                             |                  |                                                    |             |           |                         |                     |                   |               |                 |                    |
| Dasanayake 2020    |              |                          |          |             |                          |                  |                             |                  |                                                    |             |           |                         |                     |                   |               |                 |                    |
| Dewan 2019         |              |                          |          |             |                          |                  |                             |                  |                                                    |             |           |                         |                     |                   |               |                 |                    |
| Gupta 2018         |              |                          |          |             |                          |                  |                             |                  |                                                    |             |           |                         |                     |                   |               |                 |                    |
| Habib, 2020        |              |                          |          |             |                          |                  |                             |                  |                                                    |             |           |                         |                     |                   |               |                 |                    |
| Kant 2016          |              |                          |          |             |                          |                  |                             |                  |                                                    |             |           |                         |                     |                   |               |                 |                    |
| Kumar 2019         |              |                          |          |             |                          |                  |                             |                  |                                                    |             |           |                         |                     |                   |               |                 |                    |
| Mishra 2017        |              |                          |          |             |                          |                  |                             |                  |                                                    |             |           |                         |                     |                   |               |                 |                    |
| Moniz, 2019        |              |                          |          |             |                          |                  |                             |                  |                                                    |             |           |                         |                     |                   |               |                 |                    |
| N'Guessan 2020     |              |                          |          |             |                          |                  |                             |                  |                                                    |             |           |                         |                     |                   |               |                 |                    |
| Nisar, 2020        |              |                          |          |             |                          |                  |                             |                  |                                                    |             |           |                         |                     |                   |               |                 |                    |
| Omona, 2020        |              |                          |          |             |                          |                  |                             |                  |                                                    |             |           |                         |                     |                   |               |                 |                    |
| Sinkey, 2021       |              |                          |          |             |                          |                  |                             |                  |                                                    |             |           |                         |                     |                   |               |                 |                    |
| Trigueiro, 2021    |              |                          |          |             |                          |                  |                             |                  |                                                    |             |           |                         |                     |                   |               |                 |                    |
| Whiteman, 2012     |              |                          |          |             |                          |                  |                             |                  |                                                    |             |           |                         |                     |                   |               |                 |                    |
| Wu, 2020           |              |                          |          |             |                          |                  |                             |                  |                                                    |             |           |                         |                     |                   |               |                 |                    |
| Yadav, 2020        |              |                          |          |             |                          |                  |                             |                  |                                                    |             |           |                         |                     |                   |               |                 |                    |

**Key**

|  |                                     |
|--|-------------------------------------|
|  | Meets good quality criteria         |
|  | Criteria not applicable             |
|  | Does not meet good quality criteria |

**Table 3b. Motheral (ISPOR) tool for Retrospective studies, continued**

| First Author,<br>year | Statistics           |                      |                      |                       |                                       |                   |                     | Discussion/Conclusions |                                                    |                  | Overall Quality                       |                                                  |
|-----------------------|----------------------|----------------------|----------------------|-----------------------|---------------------------------------|-------------------|---------------------|------------------------|----------------------------------------------------|------------------|---------------------------------------|--------------------------------------------------|
|                       | Control<br>variables | Statistical<br>model | Influential<br>cases | Relevant<br>variables | Testing<br>statistical<br>assumptions | Multiple<br>tests | Model<br>prediction | Theoretical<br>Basis   | Practical<br>versus<br>Statistical<br>Significance | Generalizability | Score: Yes +<br>Not applicable<br>(%) | Good: 70%-<br>100%<br>Fair: 50%-69%<br>Low: <50% |
| Allison 2021          |                      |                      |                      |                       |                                       |                   |                     |                        |                                                    |                  | 85%                                   | Good                                             |
| Cole, 2019            |                      |                      |                      |                       |                                       |                   |                     |                        |                                                    |                  | 48%                                   | Low                                              |
| Cowill, 2018          |                      |                      |                      |                       |                                       |                   |                     |                        |                                                    |                  | 59%                                   | Fair                                             |
| Dasanayake 2020       |                      |                      |                      |                       |                                       |                   |                     |                        |                                                    |                  | 74%                                   | Good                                             |
| Dewan 2019            |                      |                      |                      |                       |                                       |                   |                     |                        |                                                    |                  | 74%                                   | Good                                             |
| Gupta 2018            |                      |                      |                      |                       |                                       |                   |                     |                        |                                                    |                  | 81%                                   | Good                                             |
| Habib, 2020           |                      |                      |                      |                       |                                       |                   |                     |                        |                                                    |                  | 67%                                   | Fair                                             |
| Kant 2016             |                      |                      |                      |                       |                                       |                   |                     |                        |                                                    |                  | 70%                                   | Good                                             |
| Kumar 2019            |                      |                      |                      |                       |                                       |                   |                     |                        |                                                    |                  | 78%                                   | Good                                             |
| Mishra 2017           |                      |                      |                      |                       |                                       |                   |                     |                        |                                                    |                  | 67%                                   | Fair                                             |
| Moniz, 2019           |                      |                      |                      |                       |                                       |                   |                     |                        |                                                    |                  | 93%                                   | Good                                             |
| N'Guessan 2020        |                      |                      |                      |                       |                                       |                   |                     |                        |                                                    |                  | 74%                                   | Good                                             |
| Nisar, 2020           |                      |                      |                      |                       |                                       |                   |                     |                        |                                                    |                  | 74%                                   | Good                                             |
| Omona, 2020           |                      |                      |                      |                       |                                       |                   |                     |                        |                                                    |                  | 78%                                   | Good                                             |
| Sinkey, 2021          |                      |                      |                      |                       |                                       |                   |                     |                        |                                                    |                  | 85%                                   | Good                                             |
| Trigueiro, 2021       |                      |                      |                      |                       |                                       |                   |                     |                        |                                                    |                  | 81%                                   | Good                                             |
| Whiteman, 2012        |                      |                      |                      |                       |                                       |                   |                     |                        |                                                    |                  | 78%                                   | Good                                             |
| Wu, 2020              |                      |                      |                      |                       |                                       |                   |                     |                        |                                                    |                  | 81%                                   | Good                                             |
| Yadav, 2020           |                      |                      |                      |                       |                                       |                   |                     |                        |                                                    |                  | 78%                                   | Good                                             |

**Key**

|  |                                     |
|--|-------------------------------------|
|  | Meets good quality criteria         |
|  | Criteria not applicable             |
|  | Does not meet good quality criteria |

**Table 3c. JBI Critical appraisal tool for Cross-sectional studies**

Moola S, Munn Z, Tufanaru C, Aromataris E, Sears K, Sfetcu R, Currie M, Qureshi R, Mattis P, Lisy K, Mu P-F. Chapter 7: Systematic reviews of etiology and risk . In: Aromataris E, Munn Z (Editors). JBI Manual for Evidence Synthesis. JBI, 2020. Available from <https://synthesismanual.jbi.global>

| First Author, year | Checklist             |                          |                         |                                  |                                       |                                       |                          |                         | Overall Quality                 |                                              |
|--------------------|-----------------------|--------------------------|-------------------------|----------------------------------|---------------------------------------|---------------------------------------|--------------------------|-------------------------|---------------------------------|----------------------------------------------|
|                    | 1. Inclusion criteria | 2. Subjects' description | 3. Exposure measurement | 4. Criteria used for measurement | 5. Confounding factors identification | 6. Strategies for confounding factors | 7. Outcomes' measurement | 8. Statistical analysis | Score: Yes + Not applicable (%) | Good: 70%-100%<br>Fair: 50%-69%<br>Low: <50% |
| Bhutta 2011        |                       |                          |                         |                                  |                                       |                                       |                          |                         | 100%                            | Good                                         |
| Boydell, 2020      |                       |                          |                         |                                  |                                       |                                       |                          |                         | 63%                             | Fair                                         |
| da Silva, 2020     |                       |                          |                         |                                  |                                       |                                       |                          |                         | 63%                             | Fair                                         |
| Eluwa 2016         |                       |                          |                         |                                  |                                       |                                       |                          |                         | 100%                            | Good                                         |
| Gallagher 2019     |                       |                          |                         |                                  |                                       |                                       |                          |                         | 50%                             | Fair                                         |
| Geda, 2021         |                       |                          |                         |                                  |                                       |                                       |                          |                         | 63%                             | Fair                                         |
| Ghafoor, 2020      |                       |                          |                         |                                  |                                       |                                       |                          |                         | 63%                             | Fair                                         |
| Kanakuze, 2020     |                       |                          |                         |                                  |                                       |                                       |                          |                         | 63%                             | Fair                                         |
| Karra 2017         |                       |                          |                         |                                  |                                       |                                       |                          |                         | 88%                             | Good                                         |
| Lerma 2020         |                       |                          |                         |                                  |                                       |                                       |                          |                         | 100%                            | Good                                         |
| Melkie, 2021       |                       |                          |                         |                                  |                                       |                                       |                          |                         | 50%                             | Fair                                         |
| Pfitzer 2015       |                       |                          |                         |                                  |                                       |                                       |                          |                         | 13%                             | Low                                          |
| Pleah 2016         |                       |                          |                         |                                  |                                       |                                       |                          |                         | 13%                             | Low                                          |
| Singal, 2021       |                       |                          |                         |                                  |                                       |                                       |                          |                         | 63%                             | Fair                                         |
| Smith, 2021        |                       |                          |                         |                                  |                                       |                                       |                          |                         | 63%                             | Fair                                         |
| Thapa, 2020        |                       |                          |                         |                                  |                                       |                                       |                          |                         | 63%                             | Fair                                         |
| Yadav 2016         |                       |                          |                         |                                  |                                       |                                       |                          |                         | 100%                            | Good                                         |

**Key**

|  |                                     |
|--|-------------------------------------|
|  | Meets good quality criteria         |
|  | Criteria not applicable             |
|  | Does not meet good quality criteria |

**Table 3d. JBI Critical appraisal tool - Non-randomized interventional**

Tufanaru C, Munn Z, Aromataris E, Campbell J, Hopp L. Chapter 3: Systematic reviews of effectiveness. In: Aromataris E, Munn Z (Editors). JBI Manual for Evidence Synthesis. JBI, 2020. Available from <https://synthesismanual.jbi.global>

| First Author, year     | Checklist                      |                         |                         |                  |                                           |                    |                     |                          |                         | Overall Quality                 |                                              |
|------------------------|--------------------------------|-------------------------|-------------------------|------------------|-------------------------------------------|--------------------|---------------------|--------------------------|-------------------------|---------------------------------|----------------------------------------------|
|                        | 1. Cause and effect definition | 2. Participants matched | 3. Similar intervention | 4. Control group | 5. Measurements pre and post intervention | 6. Study follow-up | 7. Outcomes' report | 8. Outcomes' measurement | 9. Statistical analysis | Score: Yes + Not applicable (%) | Good: 70%-100%<br>Fair: 50%-69%<br>Low: <50% |
| Abro, 2018             |                                |                         |                         |                  |                                           |                    |                     |                          |                         | 89%                             | Good                                         |
| Agrawal, 2021          |                                |                         |                         |                  |                                           |                    |                     |                          |                         | 78%                             | Good                                         |
| Akram, 2018            |                                |                         |                         |                  |                                           |                    |                     |                          |                         | 78%                             | Good                                         |
| Bhat, 2016             |                                |                         |                         |                  |                                           |                    |                     |                          |                         | 78%                             | Good                                         |
| Çelen, 2011            |                                |                         |                         |                  |                                           |                    |                     |                          |                         | 89%                             | Good                                         |
| Chakheni, 2017         |                                |                         |                         |                  |                                           |                    |                     |                          |                         | 89%                             | Good                                         |
| Cooper, 2020           |                                |                         |                         |                  |                                           |                    |                     |                          |                         | 78%                             | Good                                         |
| da Silva Nobrega, 2021 |                                |                         |                         |                  |                                           |                    |                     |                          |                         | 100%                            | Good                                         |
| Dewan, 2017            |                                |                         |                         |                  |                                           |                    |                     |                          |                         | 100%                            | Good                                         |
| Divakar, 2019          |                                |                         |                         |                  |                                           |                    |                     |                          |                         | 78%                             | Good                                         |
| Elsedeek, 2012         |                                |                         |                         |                  |                                           |                    |                     |                          |                         | 100%                            | Good                                         |
| Elsedeek, 2015         |                                |                         |                         |                  |                                           |                    |                     |                          |                         | 89%                             | Good                                         |
| Elshamy, 2021          |                                |                         |                         |                  |                                           |                    |                     |                          |                         | 100%                            | Good                                         |
| Eser, 2018             |                                |                         |                         |                  |                                           |                    |                     |                          |                         | 89%                             | Good                                         |
| Espey, 2021            |                                |                         |                         |                  |                                           |                    |                     |                          |                         | 56%                             | Fair                                         |
| Fatema, 2018           |                                |                         |                         |                  |                                           |                    |                     |                          |                         | 78%                             | Good                                         |
| Fatima, 2018           |                                |                         |                         |                  |                                           |                    |                     |                          |                         | 89%                             | Good                                         |
| Glasier, 2020          |                                |                         |                         |                  |                                           |                    |                     |                          |                         | 100%                            | Good                                         |
| Gueye, 2013            |                                |                         |                         |                  |                                           |                    |                     |                          |                         | 78%                             | Good                                         |
| Gupta, 2015            |                                |                         |                         |                  |                                           |                    |                     |                          |                         | 78%                             | Good                                         |
| Halder, 2016           |                                |                         |                         |                  |                                           |                    |                     |                          |                         | 89%                             | Good                                         |
| Heller, 2017           |                                |                         |                         |                  |                                           |                    |                     |                          |                         | 78%                             | Good                                         |
| Hooda, 2016            |                                |                         |                         |                  |                                           |                    |                     |                          |                         | 78%                             | Good                                         |
| Ingabire, 2018         |                                |                         |                         |                  |                                           |                    |                     |                          |                         | 67%                             | Fair                                         |
| Jairaj, 2016           |                                |                         |                         |                  |                                           |                    |                     |                          |                         | 78%                             | Good                                         |
| Khan, 2018             |                                |                         |                         |                  |                                           |                    |                     |                          |                         | 89%                             | Good                                         |
| Makins, 2018           |                                |                         |                         |                  |                                           |                    |                     |                          |                         | 67%                             | Fair                                         |
| Mishra, 2014           |                                |                         |                         |                  |                                           |                    |                     |                          |                         | 78%                             | Good                                         |
| Nigam, 2018            |                                |                         |                         |                  |                                           |                    |                     |                          |                         | 89%                             | Good                                         |
| Prager, 2012           |                                |                         |                         |                  |                                           |                    |                     |                          |                         | 89%                             | Good                                         |

|                   |  |  |  |  |  |  |  |  |  |      |      |
|-------------------|--|--|--|--|--|--|--|--|--|------|------|
| Rani, 2015        |  |  |  |  |  |  |  |  |  | 100% | Good |
| Rwegoshora, 2020  |  |  |  |  |  |  |  |  |  | 78%  | Good |
| Singh, 2016       |  |  |  |  |  |  |  |  |  | 89%  | Good |
| Sucak, 2015       |  |  |  |  |  |  |  |  |  | 78%  | Good |
| Vishwakarma, 2020 |  |  |  |  |  |  |  |  |  | 89%  | Good |
| Wasim, 2018       |  |  |  |  |  |  |  |  |  | 89%  | Good |
| Wayessa, 2020     |  |  |  |  |  |  |  |  |  | 100% | Good |
| Weerasekera, 2018 |  |  |  |  |  |  |  |  |  | 78%  | Good |
| Zaman, 2020       |  |  |  |  |  |  |  |  |  | 100% | Good |

Key

Meets good quality criteria

Criteria not applicable

**Table 3e. Cochrane's tool for Randomized controlled trials**

Higgins, J.P.T., et al., The Cochrane Collaboration's tool for assessing risk of bias in randomised trials. BMJ, 2011. 343: p. d5928.

| First Author, year   | Selection bias             |                        | Reporting bias      | Other bias            | Performance bias                      | Detection bias                | Attrition bias          | Overall Risk of bias |                                               |
|----------------------|----------------------------|------------------------|---------------------|-----------------------|---------------------------------------|-------------------------------|-------------------------|----------------------|-----------------------------------------------|
|                      | Random sequence generation | Allocation concealment | Selective reporting | Other sources of bias | Blinding (participants and personnel) | Blinding (outcome assessment) | Incomplete outcome data | Low risk of bias (%) | Low: 70%-100%<br>Medium: 50-69%<br>High: <50% |
| Agarwal 2017         |                            |                        |                     |                       |                                       |                               |                         | 57%                  | Medium                                        |
| Bayoumi, 2020        |                            |                        |                     |                       |                                       |                               |                         | 57%                  | Medium                                        |
| Blumenthal 2018      |                            |                        |                     |                       |                                       |                               |                         | 57%                  | Medium                                        |
| Braniff 2015         |                            |                        |                     |                       |                                       |                               |                         | 57%                  | Medium                                        |
| Bryant 2013          |                            |                        |                     |                       |                                       |                               |                         | 57%                  | Medium                                        |
| Chen, 2010           |                            |                        |                     |                       |                                       |                               |                         | 71%                  | Low                                           |
| Dahlke, 2011         |                            |                        |                     |                       |                                       |                               |                         | 43%                  | High                                          |
| El Beltagy 2011      |                            |                        |                     |                       |                                       |                               |                         | 29%                  | High                                          |
| Huber-Krum, 2020     |                            |                        |                     |                       |                                       |                               |                         | 57%                  | Medium                                        |
| Khan, 2020           |                            |                        |                     |                       |                                       |                               |                         | 43%                  | High                                          |
| Laporte 2020         |                            |                        |                     |                       |                                       |                               |                         | 57%                  | Medium                                        |
| Lester 2015          |                            |                        |                     |                       |                                       |                               |                         | 43%                  | High                                          |
| Levi, 2015           |                            |                        |                     |                       |                                       |                               |                         | 43%                  | High                                          |
| Ndegwa 2014          |                            |                        |                     |                       |                                       |                               |                         | 29%                  | High                                          |
| Pradhan 2019         |                            |                        |                     |                       |                                       |                               |                         | 14%                  | High                                          |
| Puri, 2020           |                            |                        |                     |                       |                                       |                               |                         | 57%                  | Medium                                        |
| Ragab 2015           |                            |                        |                     |                       |                                       |                               |                         | 29%                  | High                                          |
| Singata-Madliki 2016 |                            |                        |                     |                       |                                       |                               |                         | 57%                  | Medium                                        |
| Soon, 2018           |                            |                        |                     |                       |                                       |                               |                         | 29%                  | High                                          |
| Stuart, 2015         |                            |                        |                     |                       |                                       |                               |                         | 43%                  | High                                          |
| Turok, 2017          |                            |                        |                     |                       |                                       |                               |                         | 43%                  | High                                          |
| Unal 2018            |                            |                        |                     |                       |                                       |                               |                         | 57%                  | Medium                                        |
| Whitaker, 2014       |                            |                        |                     |                       |                                       |                               |                         | 71%                  | Low                                           |

**Key**

|  |                      |
|--|----------------------|
|  | Low risk of bias     |
|  | Unclear risk of bias |
|  | High risk of bias    |



Supplemental Table 4. Pregnancies

| First author, publication year | Study design                | Data source standard | Country       | Years of data collection | Sample size | IUD type              | Delivery type | Pregnancies                                                                                                                                                                                                                                                                                                                                      |
|--------------------------------|-----------------------------|----------------------|---------------|--------------------------|-------------|-----------------------|---------------|--------------------------------------------------------------------------------------------------------------------------------------------------------------------------------------------------------------------------------------------------------------------------------------------------------------------------------------------------|
| Gurney, 2020                   | Prospective observational   | Single center        | US            | 2016–2018                | 109         | Copper                | Cesarean      | 6 months: 0                                                                                                                                                                                                                                                                                                                                      |
| Wu, 2020                       | Retrospective               | Single center        | US            | 2015–2016                | 595         | Both                  | Both          | 18 months: 7.4% (44/595)                                                                                                                                                                                                                                                                                                                         |
| Gunardi, 2021                  | Prospective observational   | Single center        | Indonesia     | 2018–2019                | 94          | Copper                | Both          | 6 months: 0%                                                                                                                                                                                                                                                                                                                                     |
| Cooper, 2020                   | Non-randomized intervention | Multicenter (n=2)    | UK (Scotland) | 2017–2019                | 379         | Both                  | Vaginal       | 12 months: 8 (2.1%)<br>6 occurred in women who either did not attend initial follow-up (n=2) or declined re-insertion (or alternative method) following confirmed expulsion (n=4)<br>One was a planned pregnancy after device removal at 10 months postpartum<br>Another pregnancy followed device removal for colposcopy at 8 months postpartum |
| Cohen, 2016                    | Prospective observational   | Single center        | US            | 2010–2011                | 82          | Both                  | Both          | 12 months: 5/67 patients (7.6%)<br>0/5 due to IUD failure (all were after discontinuation)                                                                                                                                                                                                                                                       |
| Çelen, 2011                    | Non-randomized intervention | Single center        | Turkey        | 2006–2008                | 245         | Copper                | Cesarean      | 12 months: 1 (0.4%)                                                                                                                                                                                                                                                                                                                              |
| Sucak, 2015                    | Non-randomized intervention | Single center        | Turkey        | 2009–2012                | 160         | Copper                | Both          | 12 months: 0%                                                                                                                                                                                                                                                                                                                                    |
| Gurney, 2018                   | Prospective observational   | Single center        | US            | 2015–2017                | 200         | Copper                | Vaginal       | 6 months: 2/162 patients (1.2%; 95% CI: 0%–4.4%)                                                                                                                                                                                                                                                                                                 |
| Woo, 2015                      | Prospective observational   | Single center        | US            | 2011–2012                | 133         | NR                    | NR            | 6 months: 0/43 patients (0.0%)                                                                                                                                                                                                                                                                                                                   |
| Jatlaoui, 2014                 | Prospective observational   | Single center        | US            | 2009–2011                | 99          | Both                  | Vaginal       | 6 months: 0/99 (0%)                                                                                                                                                                                                                                                                                                                              |
| Chen, 2010                     | RCT                         | Single center        | US            | 2007–2008                | 51          | Hormonal              | Vaginal       | 6 months: 0 (0%)                                                                                                                                                                                                                                                                                                                                 |
| Stuart, 2015                   | RCT                         | Single center        | US            | 2012–2013                | 17          | Hormonal              | Vaginal       | 6 months: 0 (0%)                                                                                                                                                                                                                                                                                                                                 |
| Levi, 2015                     | RCT                         | Single center        | US            | 2012–2014                | 112         | Both                  | Cesarean      | 6 months: 0 (0%)                                                                                                                                                                                                                                                                                                                                 |
| Eser 2018                      | Non-randomized intervention | Single center        | Turkey        | NR                       | 100         | Copper                | Cesarean      | 2–3 months: 0% (0%)                                                                                                                                                                                                                                                                                                                              |
| Unal                           | RCT                         | Single center        | Turkey        | 2016–2017                | 140         | Copper (IUD inserter) | Cesarean      | Median 96 days: 0/69 (0%)                                                                                                                                                                                                                                                                                                                        |

|                  |                             |                   |                        |           |       |        |          |                                  |
|------------------|-----------------------------|-------------------|------------------------|-----------|-------|--------|----------|----------------------------------|
| Totals           |                             |                   |                        |           | 2,516 |        |          | 60                               |
| Bayoumi, 2020    | RCT                         | Single center     | Egypt                  | 2016–2018 | 500   | Copper | Cesarean | 12 months: 22/500 (4.4%)         |
| Butt, 2020       | Prospective observational   | Single center     | Pakistan               | 2016–2018 | 324   | Copper | Both     | 12 months: 0%                    |
| Gupta, 2015      | Non-randomized intervention | Single center     | India                  | 2013–2014 | 150   | Copper | Both     | 6 months: 0                      |
| Habib, 2020      | Retrospective               | Single center     | Pakistan               | 2019–2020 | 120   | Copper | Vaginal  | 6 months: 0                      |
| Khan, 2020       | RCT                         | Single center     | Pakistan               | 2019–2020 | 152   | Copper | Vaginal  | 3 months: 3/152 (1.97%)          |
| Qazi, 2020       | Prospective observational   | Single center     | Pakistan               | 2018–2019 | 200   | Copper | Both     | 3 months: 0                      |
| Rani, 2015       | Non-randomized intervention | Single center     | India                  | NR        | 99    | Copper | Vaginal  | 6 months: 0                      |
| Rwegoshora, 2020 | Non-randomized intervention | Multicenter (n=6) | Tanzania               | 2017–2018 | 511   | Copper | Both     | 12 months: 1/511 (0.2%)          |
| Yadav, 2020      | Retrospective               | Single center     | India                  | 2013–2019 | 3,753 | Copper | Both     | 3 months: 0                      |
| Zaman, 2020      | Non-randomized intervention | Single center     | Pakistan               | 2015–2015 | 122   | Copper | NR       | 6 months: 0                      |
| Halder 2016      | Non-randomized intervention | Single center     | India                  | 2012–2013 | 190   | Copper | Both     | 18 months: 0                     |
| Khurshid, 2020   | Prospective observational   | Single center     | India                  | 2015–2016 | 238   | Copper | Vaginal  | 12 months: 1/139 (0.7%)          |
| Dasanayake, 2020 | Retrospective               | Single center     | Sri Lanka              | 2014–2019 | 119   | NR     | Both     | 12 months: 0                     |
| Singal, 2014     | Prospective observational   | Single center     | India                  | 2012–2012 | 300   | Copper | Cesarean | 12 months: 2/300 (0.6%)          |
| Ragab, 2015      | RCT                         | Multicenter (n=3) | Egypt and Saudi Arabia | 2013–2014 | 120   | Copper | Cesarean | 12 months: 2/120 (1.7)           |
| Mani, 2018       | Prospective observational   | Single center     | India                  | NR        | 200   | Copper | Both     | 6 months: 1 in 10 min group (1%) |
| Gupta, 2014      | Prospective observational   | Single center     | India                  | 2011–2013 | 100   | Copper | Both     | 6 months: 0                      |
| Mishra, 2014     | Non-randomized intervention | Single center     | India                  | 2012–2013 | 564   | Copper | Both     | 6 months: 0                      |
| Wasim, 2018      | Non-randomized intervention | Single center     | Pakistan               | 2015–2017 | 1250  | Copper | Both     | 6 months: 0                      |
| Jakhar, 2019     | Prospective observational   | Single center     | India                  | 2013–2014 | 200   | Copper | Cesarean | 6 months: 0                      |
| Harani, 2019     | Prospective observational   | Single center     | India                  | 2017      | 254   | Copper | Both     | 3 months: 0                      |

|              |               |               |       |           |       |        |      |                         |
|--------------|---------------|---------------|-------|-----------|-------|--------|------|-------------------------|
| Mishra, 2017 | Retrospective | Single center | India | 2010–2012 | 209   | Copper | Both | 3 months: 4/209 (1.91%) |
| Totals       |               |               |       |           | 9,675 |        |      | 36                      |

Key: CI – confidence interval; IUD – intrauterine device; NR – not reported; RCT – randomized controlled trial; UK – United Kingdom; US – United States.

**Supplemental Table 5. PPIUD expulsions reported in studies from higher-income countries**

| First author, publication year | Study design                | Sample size | IUD type | Delivery type (vaginal; cesarean)            | Immediate (%)                                 | 3 months (%)                                                                                   | 6 months (%)                                                                                                    | 12 months (%)                                                         |
|--------------------------------|-----------------------------|-------------|----------|----------------------------------------------|-----------------------------------------------|------------------------------------------------------------------------------------------------|-----------------------------------------------------------------------------------------------------------------|-----------------------------------------------------------------------|
| Ariadi, 2017                   | Prospective observational   | 44          | NR       | Cesarean Insertion technique: Non-sutured CS | NR                                            | At 3 months: 5/44 (11.4%)                                                                      | NR                                                                                                              | NR                                                                    |
| Ariadi, 2017                   | Prospective observational   | 44          | NR       | Cesarean Insertion technique: Sutured CS     | NR                                            | 0                                                                                              | NR                                                                                                              | NR                                                                    |
| Boydell, 2020                  | Cross-sectional             | 35          | Both     | Both                                         | NR                                            | 4-6 weeks Partial/complete expulsion: 4/35 (11.4%)                                             | NR                                                                                                              | NR                                                                    |
| Braniff, 2015                  | RCT                         | 25          | Hormonal | Cesarean                                     | NR                                            | NR                                                                                             | At 6 months: 0%                                                                                                 | NR                                                                    |
| Çelen, 2011                    | Non-randomized intervention | 245         | Copper   | Cesarean                                     | 2 days: 1.2%                                  | 6 weeks: 5.3%                                                                                  | At 6 months: 10.6%                                                                                              | At 12 months: 17.6%                                                   |
| Chen, 2010                     | RCT                         | 51          | Hormonal | Vaginal                                      | NR                                            | At 6–8 weeks: 9/50 (18%)                                                                       | Between 6 and 8 weeks and 6 months: 6%<br>Up to 6 months: 12/50 (24%); complete: 9/50 (18%); partial: 3/50 (6%) | NR                                                                    |
| Cohen, 2016                    | Prospective observational   | 82          | Both     | Both                                         | NR                                            | 16/69 patients with follow-up (23%)<br>All occurred within 12 weeks of placement               | 0 between 3 mos. and 6 mos.                                                                                     | 1/67 between 6 and 12 months; patients with 12-month follow-up (1.5%) |
| Cole, 2019                     | Retrospective               | 116         | Hormonal | Both                                         | NR                                            | 13/87 (14.9%) (expulsions occurred within the first 30 days)                                   | Between 30 days and 6 months: 3/87=3.4%                                                                         | NR                                                                    |
| Colwill, 2018                  | Retrospective               | 210         | Copper   | Both                                         | Complete expulsion on PPD day 0: 3/169 (1.8%) | Overall: 5.9%<br>Complete expulsion: 8/169 (4.7%); partial expulsion: 2/169 (1.2%) (expulsions | NR                                                                                                              | NR                                                                    |

|                        |                             |     |          |          |    |                                                                                                                                                                                                                                                       |                                                                                                         |    |
|------------------------|-----------------------------|-----|----------|----------|----|-------------------------------------------------------------------------------------------------------------------------------------------------------------------------------------------------------------------------------------------------------|---------------------------------------------------------------------------------------------------------|----|
|                        |                             |     |          |          |    | occurred within the first 6 weeks)                                                                                                                                                                                                                    |                                                                                                         |    |
| Cooper, 2020           | Non-randomized intervention | 379 | Both     | Vaginal  | NR | At 6 weeks<br>Complete device expulsion: 29.8%; partial expulsion; and/or placement concern: 31.1%                                                                                                                                                    | NR                                                                                                      | NR |
| Dahlke, 2011           | RCT                         | 15  | Hormonal | Vaginal  | NR | NR                                                                                                                                                                                                                                                    | 4/15 (27%)                                                                                              | NR |
| Dahlke, 2011           | RCT                         | 15  | Hormonal | Vaginal  | NR | NR                                                                                                                                                                                                                                                    | 4/15 (27%)                                                                                              | NR |
| da Silva Nobrega, 2021 | Non-randomized intervention | 997 | Copper   | Both     | NR | 45–60 days<br>Complete: 6/574 (0.6%)<br>Partial: 20/574 (3.5%)<br>Total: 4.5%                                                                                                                                                                         | Cumulative up to 9 months: 61/729 (8.9%)<br>6–9 months<br>Complete: 0/371 (0%)<br>Partial: 1/371 (0.3%) | NR |
| Eser 2018              | Non-randomized intervention | 100 | Copper   | Cesarean | NR | During the first month: 1/100 (1%)                                                                                                                                                                                                                    | NR                                                                                                      | NR |
| Eggebroten, 2017       | Prospective observational   | 88  | Copper   | Both     | NR | NR                                                                                                                                                                                                                                                    | 4%                                                                                                      | NR |
| Eggebroten, 2017       | Prospective observational   | 123 | Hormonal | Both     | NR | NR                                                                                                                                                                                                                                                    | LNG IUD: 17%<br>Compared to Copper IUD:<br>Adjusted HR: 5.8; 95% CI: 1.3–26.4                           | NR |
| Goldthwaite, 2017      | Prospective observational   | 55  | Copper   | Vaginal  | NR | Total expulsions: 8/41 (19.5%)<br>Complete expulsion: 4/41 (9.8%)<br>Partial expulsion: 4/41 (9.8%)                                                                                                                                                   | NR                                                                                                      | NR |
| Goldthwaite, 2017      | Prospective observational   | 68  | Hormonal | Vaginal  | NR | Total expulsions: 21/55 (38.2%)<br>OR: 2.55; 95% CI: 0.99–6.55; $P=0.05$ (compared to Copper IUD)<br>Complete expulsion: 15/55 (27.3%); OR: 3.47; 95% CI: 1.06–11.40; $P=0.03$ (compared to Copper IUD)<br>Partial expulsion: 6/55 (10.9%); OR: 1.13; | NR                                                                                                      | NR |

|                |                             |     |        |          |    |                                                                                                                                                                                                                                             |                                                                                                                                                                                                  |                                                       |
|----------------|-----------------------------|-----|--------|----------|----|---------------------------------------------------------------------------------------------------------------------------------------------------------------------------------------------------------------------------------------------|--------------------------------------------------------------------------------------------------------------------------------------------------------------------------------------------------|-------------------------------------------------------|
|                |                             |     |        |          |    | 95% CI: 0.03–4.31;<br><i>P</i> =0.86 (compared to Copper IUD)<br>Of the 29 total expulsions (independent of IUD type), 25 (86%) occurred ≤6 weeks postpartum                                                                                |                                                                                                                                                                                                  |                                                       |
| Gonzalez, 2020 | Prospective observational   | 93  | Both   | Cesarean | NR | Total: 8.7%<br>6/93 (6.5%) partially expelled by 3 months<br>Complete expulsion by 3 months: 2/93 (2.2%)                                                                                                                                    | Partial/complete expulsion between 3 and 6 months: 0                                                                                                                                             | Partial/complete expulsion between 6 and 12 months: 0 |
| Gunardi, 2021  | Prospective observational   | 94  | Copper | Both     | NR | At 6 weeks: 2/94 (2.1%)<br>At 3 months: 3/87 (3.5%)                                                                                                                                                                                         | 0/70 (0%)                                                                                                                                                                                        | NR                                                    |
| Gurney, 2018   | Prospective observational   | 200 | Copper | Vaginal  | NR | Total: 16%<br>9/149 patients who completed 6-week visit (6.0%) including a string check/pelvic exam had complete expulsion<br>15/149 patients who completed 6-week visit (10.1%) including a string check/pelvic exam had partial expulsion | Between 6 weeks–6 months: 15/162: 9.3%<br>13/162 patients who completed 6-month visit (8.0%) had complete expulsion<br>26/162 patients who completed 6-month visit (16.0%) had partial expulsion | NR                                                    |
| Gurney, 2020   | Prospective observational   | 109 | Copper | Cesarean | NR | At 6 weeks<br>Partial: 2/88 (2.3%)                                                                                                                                                                                                          | Complete: 2/69 (2.9%)<br>Partial: 3/69 (4.4%)                                                                                                                                                    | NR                                                    |
| Heller, 2017   | Non-randomized intervention | 877 | Both   | Cesarean | NR | At 6 weeks: 7/114 (6.14%)                                                                                                                                                                                                                   | At 14 weeks: 1/114 (0.88%)                                                                                                                                                                       | At 28 weeks: 1/114 (0.88%)                            |
| Hinz, 2019     | Prospective observational   | 39  | Both   | Both     | NR | NR                                                                                                                                                                                                                                          | 8/39 (20.5%)<br>By 6 mos, exact timing<br>NR                                                                                                                                                     | NR                                                    |
| Hinz, 2019     | Prospective observational   | 114 | Both   | Both     | NR | NR                                                                                                                                                                                                                                          | 28/114 (24.5%)<br>By 6 mos, exact timing<br>NR                                                                                                                                                   | NR                                                    |
| Hinz, 2019     | Prospective observational   | 75  | Both   | Both     | NR | NR                                                                                                                                                                                                                                          | 20/75 (26.7%)<br>By 6 mos, exact timing<br>NR                                                                                                                                                    | NR                                                    |

|                  |                           |     |                    |          |    |                                                                                                                                                                                                                                                                                                                  |                                                                     |    |
|------------------|---------------------------|-----|--------------------|----------|----|------------------------------------------------------------------------------------------------------------------------------------------------------------------------------------------------------------------------------------------------------------------------------------------------------------------|---------------------------------------------------------------------|----|
| Hochmuller, 2020 | Prospective observational | 124 | Copper             | Both     | NR | At 4 weeks: 33/124 (26.6%)                                                                                                                                                                                                                                                                                       | NR                                                                  | NR |
| Jatlaoui, 2014   | Prospective observational | 99  | Both               | Vaginal  | NR | NR                                                                                                                                                                                                                                                                                                               | 17/88 (19.3%) (10 complete, 7 partial)<br>By 6 mos, exact timing NR | NR |
| Laporte, 2020    | RCT                       | 70  | IUD type: Copper   | Both     | NR | Total and partial expulsions<br><b>Cumulative by 90 days</b><br>Vaginal delivery: 18/39 (46.2%)<br>Cesarean delivery: 4/31 (12.9%)<br><b>42 days</b><br>Vaginal delivery: 17/39 (43.2%)<br>Cesarean delivery: 4/31 (12.9%)<br><b>42–90 days</b><br>Vaginal delivery: 1/39 (2.6%)<br>Cesarean delivery: 0/31 (0%) | NR                                                                  | NR |
| Laporte, 2020    | RCT                       | 70  | IUD type: Hormonal | Both     | NR | Total and partial expulsions<br><b>Cumulative by 90 days</b><br>Vaginal delivery: 8/35 (22.6%)<br>Cesarean delivery: 4/35 (11.4%)<br><b>42 days</b><br>Vaginal delivery: 8/35 (22.6%)<br>Cesarean delivery: 4/35 (11.4%)<br><b>42–90 days</b><br>Vaginal delivery: 0/35 (0%)<br>Cesarean delivery: 0/35 (0%)     | NR                                                                  | NR |
| Levi, 2012       | Prospective observational | 90  | Copper             | Cesarean | NR | 0/43 (0%) at 6 weeks                                                                                                                                                                                                                                                                                             | 0/42 (0%)                                                           | NR |

|                 |                             |     |          |                                                |    |                                                                                            |                                                        |                                                                                                                  |
|-----------------|-----------------------------|-----|----------|------------------------------------------------|----|--------------------------------------------------------------------------------------------|--------------------------------------------------------|------------------------------------------------------------------------------------------------------------------|
| Levi, 2015      | RCT                         | 112 | Both     | Cesarean                                       | NR | 4/53 (8%), all within the first 3 weeks postpartum; excluding loss to follow-up: 4/48 (8%) | NR                                                     | NR                                                                                                               |
| Marangoni, 2021 | RCT                         | 140 | Both     | Both                                           | NR | At 6 weeks: 33/140 (23.6%)                                                                 | NR                                                     | Cumulative: 38/140 (27.1%)<br>3 months–1 year: 4/140 (2.9%)                                                      |
| Sinkey, 2021    | Retrospective               | 159 | NR       | NR                                             | NR | At 2 months: 1/9 (11%)                                                                     | NR                                                     | NR                                                                                                               |
| Soon, 2018      | RCT                         | 6   | Hormonal | Vaginal                                        | NR | 1/6 (17%)                                                                                  | NR                                                     | NR                                                                                                               |
| Stuart, 2015    | RCT                         | 17  | Hormonal | Vaginal                                        | NR | 7/17 (41%) (within 4 weeks)                                                                | NR                                                     | NR                                                                                                               |
| Sucak, 2015     | Non-randomized intervention | 47  | Copper   | Delivery type: Cesarean (emergency)            | NR | Cumulative rate of IUD expulsion<br>2 days: 2.1%<br>6 weeks: 6.7%                          | At 6 months<br>Cumulative rate of IUD expulsion: 8.9%  | Expulsion rate: 8.9%<br>Complete expulsion: 6.7%<br>Partial expulsion: 2.2%                                      |
| Sucak, 2015     | Non-randomized intervention | 62  | Copper   | Delivery type: vaginal                         | NR | Cumulative rate of IUD expulsion<br>2 days: 1.6%<br>6 weeks: 9.7%                          | At 6 months<br>Cumulative rate of IUD expulsion: 11.3% | Expulsion rate: 11.3%<br>Complete expulsion: 4.8%<br>Partial expulsion: 6.5%                                     |
| Sucak, 2015     | Non-randomized intervention | 51  | Copper   | Delivery type: Planned cesarean                | NR | Cumulative rate of IUD expulsion<br>2 days: 0%<br>6 weeks: 4.3%                            | At 6 months<br>Cumulative rate of IUD expulsion: 6.5%  | Cumulative rate of IUD expulsion:<br>Expulsion rate: 8.7%<br>Complete expulsion: 4.3%<br>Partial expulsion: 4.3% |
| Trigueiro, 2021 | Retrospective               | 828 | Copper   | NR                                             | NR | NR                                                                                         | NR                                                     | Up to 1 year: 26/247 (10.7%)                                                                                     |
| Turok, 2017     | RCT                         | 319 | Hormonal | Both                                           | NR | 24/125 (19%) (IUD retention was confirmed at 2–4 weeks)                                    | NR                                                     | NR                                                                                                               |
| Unal 2018       | RCT                         | 70  | Copper   | Cesarean (insertion technique: GyneFix)        | NR | NR                                                                                         | Median 96 days: 1/69 (1.4%)                            | NR                                                                                                               |
| Unal 2018       | RCT                         | 70  | Copper   | Cesarean (insertion technique: sponge forceps) | NR | NR                                                                                         | Median 96 days: 8/68 (11.4%)                           | NR                                                                                                               |

|                    |                           |     |          |          |    |                                                                                                                                                                |                                                                                                                                                              |    |
|--------------------|---------------------------|-----|----------|----------|----|----------------------------------------------------------------------------------------------------------------------------------------------------------------|--------------------------------------------------------------------------------------------------------------------------------------------------------------|----|
| Wallace Huff, 2021 | Prospective observational | 199 | NR       | NR       | NR | 1/24 (4.1%)                                                                                                                                                    | NR                                                                                                                                                           | NR |
| Whitaker, 2014     | RCT                       | 42  | Hormonal | Cesarean | NR | 4/20 (20.0%)                                                                                                                                                   | NR                                                                                                                                                           | NR |
| Zaconeta, 2019     | Prospective observational | 100 | Copper   | Cesarean | NR | <b>At 6 weeks</b><br>Expulsion (total exteriorization of the IUD or when transvaginal sonography showed the device was inside the cervical canal): 5/99 (5.1%) | <b>At 6 mos</b><br>Expulsion (total exteriorization of the IUD or when transvaginal sonography showed the device was inside the cervical canal): 8/97 (8.2%) |    |
| Woo, 2015          | Prospective observational | 133 | NR       | NR       | NR | NR                                                                                                                                                             | 9/55 patients who completed 6-month follow-up (16.4%)<br>By 6 mos, exact timing NR                                                                           | NR |

Key: h – hour; min – minute; mos – months; NR – not reported; RCT – randomized controlled trial.



**Supplemental Table 6. PPIUD expulsions reported in studies from lower-income countries**

| First author, publication year | Study design                | Country  | Subgroup                            | Sample size | IUD type | Delivery type (vaginal; cesarean) | Immediate (%)        | 3 months (%)                                                                                        | 6 months (%)             | 12 months (%) |
|--------------------------------|-----------------------------|----------|-------------------------------------|-------------|----------|-----------------------------------|----------------------|-----------------------------------------------------------------------------------------------------|--------------------------|---------------|
| Abro 2018                      | Non-randomized intervention | Pakistan | Overall                             | 220         | NR       | NR                                | NR                   | NR                                                                                                  | At 6 mos: 21/220 (9.5%)  | NR            |
| Agarwal, 2017                  | RCT                         | India    | IUD type: Cu375                     | 50          | Copper   | Cesarean                          | At 1 week: 1/50 (2%) | NR                                                                                                  | NR                       | NR            |
| Agarwal, 2017                  | RCT                         | India    | IUD type: CuT380A                   | 50          | Copper   | Cesarean                          | At 1 week: 2/50 (4%) | NR                                                                                                  | NR                       | NR            |
| Akram, 2018                    | Non-randomized intervention | Pakistan | Overall                             | 100         | NR       | Cesarean                          | NR                   | NR                                                                                                  | At 6 mos: 0/87 (0%)      | NR            |
| Alam, 2014                     | Prospective observational   | Pakistan | Overall                             | 100         | Copper   | NR                                | NR                   | Total: 8%<br>At 1 week<br>Partial: 4%<br>Complete: 2%<br>At 10 weeks<br>Partial: 1%<br>Complete: 1% | NR                       | NR            |
| Bayoumi, 2020                  | RCT                         | Egypt    | Overall                             | 500         | Copper   | Cesarean                          | NR                   | At 6 weeks: 49/478 (10.3%)                                                                          | 9/416 (2.2%)             | 0/396 (0%)    |
| Bhadra 2018                    | Prospective observational   | India    | Overall                             | 19,170      | NR       | Both                              | NR                   | At 6 weeks: 14/4,551 (0.3%)                                                                         | NR                       | NR            |
| Bhat 2016                      | Non-randomized intervention | India    | Overall                             | 680         | Copper   | Both                              | NR                   | NR                                                                                                  | At 6 mos: 55/644 (8.54%) | NR            |
| Blumenthal 2018                | RCT                         | India    | Insertion technique: Kelly forceps  | 239         | Copper   | Vaginal                           | NR                   | Total: 10.4%<br>6–8 weeks<br>Partial: 12/239 (5.0%)<br>Complete: 13/239 (5.4%)                      | NR                       | NR            |
| Blumenthal 2018                | RCT                         | India    | Insertion technique: PPIUD inserter | 241         | Copper   | Vaginal                           | NR                   | Total: 18.7%<br>6–8 weeks<br>Partial: 26/241 (10.8%)<br>Complete: 19/241 (7.9%)                     | NR                       | NR            |

|                  |                             |           |                                    |        |          |          |                                     |                                                                        |                           |                                                 |
|------------------|-----------------------------|-----------|------------------------------------|--------|----------|----------|-------------------------------------|------------------------------------------------------------------------|---------------------------|-------------------------------------------------|
| Blumenthal, 2016 | Prospective observational   | Zambia    | Overall                            | 305    | NR       | NR       | NR                                  | NR                                                                     | At 6 mos: 17/305 (5.6%)   | NR                                              |
| Bryant, 2013     | RCT                         | Malawi    | Insertion time: Within 48 hours    | 26     | Copper   | Vaginal  | 1 week after insertion: 1/12 (8.3%) | NR                                                                     | NR                        | NR                                              |
| Butt, 2020       | Prospective observational   | Pakistan  | Overall                            | 324    | Copper   | Both     | NR                                  | <b>At 6 weeks</b><br>Spontaneous partial expulsion: 1/50 (2.2%)        | NR                        | NR                                              |
| Chakheni, 2017   | Non-randomized intervention | India     | Insertion technique: Manual        | 50     | Copper   | Cesarean | NR                                  | <b>At 12 weeks</b><br>Displaced/partially expelled: 1/47 (2.1%)        | NR                        | NR                                              |
| Chakheni, 2017   | Non-randomized intervention | India     | Insertion technique: Kelly forceps | 50     | Copper   | Cesarean | NR                                  | <b>At 12 weeks</b><br>Displaced/partially expelled: 1/50 (2%)          | NR                        | NR                                              |
| Dasanayake, 2020 | Retrospective               | Sri Lanka | Overall                            | 14,051 | NR       | Both     | NR                                  | NR                                                                     | NR                        | <b>At 12 mos</b><br>Spontaneous expulsion: 6.7% |
| Dewan, 2017      | Non-randomized intervention | India     | Delivery type: VD                  | 63     | Copper   | Vaginal  | 1/63 (1.6%)                         | 2/58 (3.4%)                                                            | 0/54 (0%)                 | 0/52 (0%)                                       |
| Dewan, 2017      | Non-randomized intervention | India     | Delivery type: CD                  | 285    | Copper   | Cesarean | 1/285 (0.3%)                        | 0/264 (0%)                                                             | 0/263 (0%)                | 0/261 (0%)                                      |
| Dias, 2016       | Prospective observational   | Sri Lanka | Delivery type: VD                  | 60     | Copper   | Vaginal  | 2/60 (3.3%)                         | At 6 weeks: 6/91 (6.6)                                                 | NR                        | NR                                              |
| Dias, 2016       | Prospective observational   | Sri Lanka | Delivery type: CD                  | 31     | Copper   | Cesarean | 0/31 (0%)                           | At 6 weeks: 6/91 (6.6)                                                 | NR                        | NR                                              |
| Divakar, 2019    | Non-randomized intervention | India     | Overall                            | 66,508 | Copper   | Both     | NR                                  | Postpartum checkup visit (timepoint not defined)<br>Expelled IUD: 1.2% | NR                        | NR                                              |
| El Beltagy, 2011 | RCT                         | Egypt     | IUD type: Copper                   | 150    | Copper   | Vaginal  | NR                                  | At 6 weeks: 5/148 (3.4%)                                               | After 6 mos: 6.0%         | NR                                              |
| El Beltagy, 2011 | RCT                         | Egypt     | IUD type: Hormonal                 | 150    | Hormonal | Vaginal  | NR                                  | At 6 weeks: 3/147 (2.0%)                                               | After 6 mos: 9/134 (6.7%) |                                                 |

|                |                             |            |                    |      |             |          |    |                                                                             |                                                                                |                                              |
|----------------|-----------------------------|------------|--------------------|------|-------------|----------|----|-----------------------------------------------------------------------------|--------------------------------------------------------------------------------|----------------------------------------------|
| Elsedeek, 2012 | Non-randomized intervention | Egypt      | IUD type: Hormonal | 65   | Hormonal    | Cesarean | NR | NR                                                                          | NR                                                                             | Up to 1 year Spontaneous expulsion: 0 (0%)   |
| Elsedeek, 2012 | Non-randomized intervention | Egypt      | IUD type: Copper   | 75   | Copper      | Cesarean | NR | NR                                                                          | NR                                                                             | Up to 1 year Spontaneous expulsion: 5 (6.7%) |
| Elshamy, 2021  | Non-randomized intervention | Egypt      | IUD type: Copper   | 550  | Copper      | Vaginal  | NR | Complete: 25/550 (4.5%)<br>Partial: 8/550 (1.5%)                            | Cumulative: 50/550 (9.0%)<br>Complete: 11/550 (2.0%)<br>Partial: 6/550 (1.1%)  | NR                                           |
| Elshamy, 2021  | Non-randomized intervention | Egypt      | IUD type: Hormonal | 550  | Hormonal    | Vaginal  | NR | Complete: 41/550 (7.5%)<br>Partial: 11/550 (2.0%)                           | Cumulative: 77/550 (14.0%)<br>Complete: 19/550 (2.0%)<br>Partial: 6/550 (1.1%) | NR                                           |
| Eluwa 2016     | Cross-sectional             | Nigeria    | Overall            | 728  | Copper      | NR       | NR | At 6 weeks: 25/300 (8.3%)                                                   | NR                                                                             | NR                                           |
| Espey, 2021    | Non-randomized intervention | 12,068     | Copper             | Both | 10 min–48 h | Both     | NR | At 6 weeks: 77/3,372 (2.3%)                                                 | NR                                                                             | NR                                           |
| Fatema, 2018   | Non-randomized intervention | Bangladesh | Overall            | 370  | NR          | Both     | NR | At 6 weeks: 7/120 (5.8%)<br>120 patients were followed up to this timepoint | NR                                                                             | NR                                           |
| Gueye, 2013    | Non-randomized intervention | Senegal    | Overall            | 59   | Copper      | Cesarean | NR | At 1 month: 1/44 (2.2%)<br>At 3 months: 0/41 (0%)                           | At 6 mos: 0/39 (0%)                                                            | NR                                           |
| Gupta, 2014    | Prospective observational   | India      | Overall            | 100  | Copper      | Both     | NR | At 6 weeks: 9/92 (9.7%)                                                     | NR                                                                             | NR                                           |
| Gupta, 2018    | Retrospective               | India      | Delivery type: CD  | 355  | Copper      | Cesarean | NR | NR                                                                          | Up to 6 mos Spontaneous expulsion: 3 (0.8%)                                    | NR                                           |

|                 |                                |          |                                                   |     |        |          |    |                                                                                                |                                                       |                                  |
|-----------------|--------------------------------|----------|---------------------------------------------------|-----|--------|----------|----|------------------------------------------------------------------------------------------------|-------------------------------------------------------|----------------------------------|
| Gupta, 2018     | Retrospective                  | India    | Delivery type: VD<br>Insertion time: 10 min–48 h  | 247 | Copper | Vaginal  | NR | NR                                                                                             | Up to 6 mos<br>Spontaneous<br>expulsion: 7<br>(2.8%)  | NR                               |
| Gupta, 2018     | Retrospective                  | India    | Delivery type: VD<br>Insertion time: Up to 10 min | 814 | Copper | Vaginal  | NR | NR                                                                                             | Up to 6 mos<br>Spontaneous<br>expulsion: 15<br>(1.8%) | NR                               |
| Gupta, 2015     | Non-randomized<br>intervention | India    | Overall                                           | 150 | Copper | Both     | NR | At 6 weeks: NR<br>(14.5%)<br>At 3 months: NR<br>(2.9%)                                         | 0                                                     | NR                               |
| Habib, 2020     | Retrospective                  | Pakistan | Delivery type: Vaginal                            | 60  | Copper | Vaginal  | NR | NR                                                                                             | 2/60 (3.3%)                                           | NR                               |
| Habib, 2020     | Retrospective                  | Pakistan | Delivery type: Cesarean                           | 60  | Copper | Cesarean | NR | NR                                                                                             | 4/60 (6.7%)                                           | NR                               |
| Halder 2016     | Non-randomized<br>intervention | India    | Delivery type: VD<br>Insertion time: Up to 10 min | 100 | Copper | Vaginal  | NR | NR                                                                                             | NR                                                    | 6 weeks–18<br>mos: 4/100<br>(4%) |
| Halder 2016     | Non-randomized<br>intervention | India    | Delivery type: CS                                 | 100 | Copper | Cesarean | NR | NR                                                                                             | NR                                                    | 6 weeks–18<br>mos: 2/100<br>(2%) |
| Harani, 2019    | Prospective<br>observational   | India    | Delivery type: CS                                 | 127 | Copper | Cesarean | NR | Total: 3.9%<br>Expulsion at 6<br>weeks: 1 (0.8%)<br>Expulsion rate at<br>3 months: 4<br>(3.1%) | NR                                                    | NR                               |
| Harani, 2019    | Prospective<br>observational   | India    | Delivery type: VD                                 | 127 | Copper | Vaginal  | NR | Total: 8.6%<br>Expulsion at 6<br>weeks: 5 (3.9%)<br>Expulsion rate at<br>3 months: 6<br>(4.7%) | NR                                                    | NR                               |
| Hooda, 2016     | Non-randomized<br>intervention | India    | Overall                                           | 593 | Copper | Both     | NR | At 6 weeks:<br>9/171 (5.3%)                                                                    | NR                                                    | NR                               |
| Ifitikhar, 2019 | Prospective<br>observational   | Pakistan | Overall                                           | 372 | NR     | Both     | NR | At 6 weeks:<br>15/372 (4.2%)                                                                   | NR                                                    | NR                               |

|                |                             |          |                                    |       |        |          |    |                                                                                                       |                                                                                                         |                                                                                        |
|----------------|-----------------------------|----------|------------------------------------|-------|--------|----------|----|-------------------------------------------------------------------------------------------------------|---------------------------------------------------------------------------------------------------------|----------------------------------------------------------------------------------------|
| Ingabire, 2018 | Non-randomized intervention | Rwanda   | Overall                            | 9,020 | Copper | Both     | NR | 10 days–6 weeks: 77/1,399 (5.5%)<br>Among 1,399 women who attended follow-up                          | NR                                                                                                      | NR                                                                                     |
| Jairaj, 2016   | Non-randomized intervention | India    | Overall                            | 370   | NR     | Both     | NR | At 6 weeks: 5/62 (8.1%)                                                                               | NR                                                                                                      | NR                                                                                     |
| Jakhar, 2019   | Prospective observational   | India    | Overall                            | 200   | Copper | Cesarean | NR | At 6 weeks<br>Expulsion: 3 (1.5%)                                                                     | At 6 mos<br>Expulsion: 5 (2.5%)                                                                         | NR                                                                                     |
| Kant, 2016     | Retrospective               | India    | Overall                            | 611   | Copper | Vaginal  | NR | At 6 weeks:<br>23/130 (17.7%)                                                                         | NR                                                                                                      | NR                                                                                     |
| Khan, 2018     | Non-randomized intervention | Pakistan | Overall                            | 500   | Copper | Both     | NR | NR                                                                                                    | 1.5 mos–6 mos:<br>29/500 (5.8%)                                                                         | NR                                                                                     |
| Khan, 2020     | RCT                         | Pakistan | Delivery type:<br>VD               | 76    | Copper | Vaginal  | NR | 1/76 (1.3%)                                                                                           | NR                                                                                                      | NR                                                                                     |
| Khan, 2020     | RCT                         | Pakistan | Delivery type:<br>CS               | 76    | Copper | Cesarean | NR | 2/76 (2.6%)                                                                                           | NR                                                                                                      | NR                                                                                     |
| Khurshid, 2020 | Prospective observational   | India    | Insertion time:<br>Within 48 hours | 238   | Copper | Vaginal  | NR | <b>At 6 weeks</b><br>Cumulative expulsion rate:<br>19 (8.7%)<br>Interval expulsion rate:<br>19 (8.7%) | <b>At 6 months</b><br>Cumulative expulsion rate:<br>29 (14.5%)<br>Interval expulsion rate:<br>10 (5.8%) | <b>At 12 mos</b><br>Cumulative expulsions: 33 (17.3%)<br>Interval expulsions: 4 (2.8%) |
| Kumar, 2014    | Prospective observational   | India    | Overall                            | 2,733 | Copper | Both     | NR | At 6 weeks:<br>63/1,730 (3.6%)                                                                        | NR                                                                                                      | NR                                                                                     |
| Kumar, 2019    | Retrospective               | India    | Overall                            | 844   | Copper | Both     | NR | Before 6 weeks:<br>4.7%                                                                               | Between 6 weeks and 6 mos:<br>2.1%                                                                      | <b>At 12 mos</b><br>Accumulative expulsion: 7.5%<br><b>From 6–12 mos:</b> 0.7%         |
| Lerma, 2020    | Cross-sectional             | India    | Insertion time:<br>Within 10 min   | 93    | Copper | Vaginal  | NR | Total: 8.6%<br><b>6–8 weeks</b><br>Complete: 3/93 (3.2%)                                              | NR                                                                                                      | NR                                                                                     |

|                |                                    |                                                                  |                                  |         |        |          |    |                                                                                                              |                                     |    |
|----------------|------------------------------------|------------------------------------------------------------------|----------------------------------|---------|--------|----------|----|--------------------------------------------------------------------------------------------------------------|-------------------------------------|----|
|                |                                    |                                                                  |                                  |         |        |          |    | Partial: 5/93<br>(5.4%)                                                                                      |                                     |    |
| Lerma, 2020    | Cross-sectional                    | India                                                            | Insertion time:<br>10 min–48 h   | 467     | Copper | Vaginal  | NR | Total: 16.3%<br><b>6–8 weeks</b><br>Complete:<br>35/467 (7.5%)<br>Partial: 41/467<br>(8.8%)                  | NR                                  | NR |
| Lester, 2015   | RCT                                | Uganda                                                           | Insertion time:<br>Within 10 min | 34      | Copper | Cesarean | NR | At 6 weeks: 1/34<br>(2.9%)                                                                                   | NR                                  | NR |
| Makins 2018    | Non-<br>randomized<br>intervention | Sri Lanka,<br>India, Nepal,<br>Bangladesh,<br>Tanzania,<br>Kenya | Overall                          | 725,647 | Copper | Both     | NR | At 6 weeks: 2.6%                                                                                             | NR                                  | NR |
| Mani, 2018     | Prospective<br>observational       | India                                                            | Insertion time:<br>Within 10 min | 100     | Copper | Both     | NR | At 6 weeks<br>Expulsion: 0<br>(0%)<br>At 3 months<br>Expulsion: 1/100<br>(1%)                                | 3–6 mos<br>Expulsion:<br>1/100 (1%) | NR |
| Mani, 2018     | Prospective<br>observational       | India                                                            | Insertion time:<br>10 min–48 h   | 100     | Copper | Both     | NR | At 6 weeks<br>Expulsion: 0<br>(0%)<br>At 3 months<br>Expulsion: 1/100<br>(1%)                                | 3–6 mos<br>Expulsion:<br>2/100 (2%) | NR |
| Mishra, 2014   | Non-<br>randomized<br>intervention | India                                                            | Overall                          | 564     | Copper | Both     | NR | <b>Within 7 days:</b><br>3/434 (0.69)<br><b>Between 7<br/>days–4 weeks:</b><br>33/434 (7.60)<br>Total: 7.69% | After 4 weeks:<br>3/434 (0.69%)     | NR |
| Mishra, 2017   | Retrospective                      | India                                                            | Overall                          | 736     | Copper | Both     | NR | At 4 weeks:<br>46/736 (6.3%)                                                                                 | NR                                  | NR |
| Muganyizi 2018 | Prospective<br>observational       | Tanzania                                                         | Overall                          | 40,470  | Copper | Vaginal  | NR | At 6 weeks:<br>14/596 (2.3%)                                                                                 | NR                                  | NR |
| Ndegwa, 2014   | RCT                                | Kenya                                                            | Overall                          | 127     | NR     | NR       | NR | At 6 weeks: 2/58<br>(3.4%)                                                                                   | NR                                  | NR |
| Ngonzi, 2021   | Prospective<br>observational       | Uganda                                                           | Overall                          | 167     | Copper | Vaginal  | NR | At 6 weeks:<br>13/144 (9%)                                                                                   | NR                                  | NR |

|                  |                             |                                                                    |                          |           |        |         |    |                                                                                                         |              |               |
|------------------|-----------------------------|--------------------------------------------------------------------|--------------------------|-----------|--------|---------|----|---------------------------------------------------------------------------------------------------------|--------------|---------------|
|                  |                             |                                                                    |                          |           |        |         |    | Partial expulsion:<br>11/144 (7.6%)<br>Complete<br>expulsion: 2/144<br>(1.4%)                           |              |               |
| N'Guessan, 2020  | Retrospective               | Ivory Coast                                                        | Overall                  | 128       | Copper | Both    | NR | Up to 6 weeks<br>HIV+: 2/67 (3%)                                                                        | NR           | NR            |
| Nisar, 2020      | Retrospective               | Pakistan                                                           | Overall                  | 8,003     | NR     | Both    | NR | At 6 weeks:<br>83/1,311 (6.3%)                                                                          | NR           | NR            |
| Pfizer, 2015     | Cross-sectional             | Guinea                                                             | Country:<br>Guinea       | 20,699    | Copper | Both    | NR | At 6 weeks<br>Expulsion: 35<br>(1.7%)                                                                   | NR           | NR            |
| Pfizer, 2015     | Cross-sectional             | India                                                              | Country: India           | 1,767,880 | Copper | Both    | NR | At 6 weeks<br>Expulsion: 989<br>(2.7%)                                                                  | NR           | NR            |
| Pfizer, 2015     | Cross-sectional             | Ethiopia                                                           | Country:<br>Ethiopia     | 16,389    | Copper | Both    | NR | At 6 weeks<br>Expulsion: 12<br>(3.6%)                                                                   | NR           | NR            |
| Pfizer, 2015     | Cross-sectional             | The Philippines                                                    | Country: The Philippines | 33,900    | Copper | Both    | NR | At 6 weeks<br>Expulsion: 11<br>(1.7%)                                                                   | NR           | NR            |
| Pfizer, 2015     | Cross-sectional             | Pakistan                                                           | Country:<br>Pakistan     | 34,502    | Copper | Both    | NR | At 6 weeks<br>Expulsion: 10<br>(3.7%)                                                                   | NR           | NR            |
| Pleah 2016       | Cross-sectional             | Benin, Ivory Coast, Niger, Senegal, Togo (West and Central Africa) | Overall                  | 15,394    | NR     | Both    | NR | <b>4–6 weeks:</b><br>19/2,269 (0.8%)<br><b>2014:</b> 1/748<br>(0.5%)<br><b>2015:</b> 18/1,521<br>(1.2%) | NR           | NR            |
| Puri, 2020       | RCT                         | Nepal                                                              | Overall                  | 75,571    | Copper | Both    | NR | NR (8.5%)                                                                                               | NR           | NR (11.1%)    |
| Qazi, 2020       | Prospective observational   | Pakistan                                                           | Overall                  | 6,283     | Copper | Both    | NR | 10/200 (5%)                                                                                             | NR           | NR            |
| Rani, 2015       | Non-randomized intervention | India                                                              | Overall                  | 99        | Copper | Vaginal | NR | NR                                                                                                      | 2/99 (2.02%) | NR            |
| Rwegoshora, 2020 | Non-randomized intervention | Tanzania                                                           | Overall                  | 20,276    | Copper | Both    | NR | NR                                                                                                      | NR           | 11/511 (2.1%) |

|                   |                             |           |                                          |         |        |          |    |                                                                                                                                                      |                                                                                  |                                                                                    |
|-------------------|-----------------------------|-----------|------------------------------------------|---------|--------|----------|----|------------------------------------------------------------------------------------------------------------------------------------------------------|----------------------------------------------------------------------------------|------------------------------------------------------------------------------------|
| Shukla, 2012      | Prospective observational   | India     | Overall                                  | 1,317   | Copper | Both     | NR | 4–6 weeks:<br>117/1,037<br>(11.3%)                                                                                                                   | Cumulative expulsions at 6 mos: 10.68%                                           | NR                                                                                 |
| Singal, 2021      | Cross-sectional             | India     | Overall                                  | 4,012   | NR     | NR       |    | NR (5.6%)                                                                                                                                            | NR (5.7%)                                                                        | NR (4.9%)                                                                          |
| Singal, 2014      | Prospective observational   | India     | Overall                                  | 300     | Copper | Cesarean | NR | Total: 2.7%<br><b>At 1 month</b><br>Complete: 0/300 (0%)<br>Partial: 4/300 (1.3%)<br><b>1–3 mos</b><br>Complete: 0/293 (0%)<br>Partial: 4/293 (1.3%) | <b>3–6 mos</b><br>Total: 2.0%<br>Complete: 4/289 (1.3%)<br>Partial: 2/289 (0.7%) | Total: 0.7%<br><b>6–12 months</b><br>Complete: 2/289 (0.7%)<br>Partial: 0/289 (0%) |
| Singh, 2021       | Prospective observational   | India     | Insertion technique: Long inserter       | 292     | Copper | Vaginal  | NR | 1/290 (0.3%)<br>[calculated, NR in publication]                                                                                                      | NR                                                                               | NR                                                                                 |
| Singh, 2021       | Prospective observational   | India     | Insertion technique: Conventional method | 301     | Copper | Vaginal  | NR | 5/296 (1.6%)<br>[calculated, NR in publication]                                                                                                      | NR                                                                               | NR                                                                                 |
| Singh 2016        | Non-randomized intervention | India     | Overall                                  | 80      | NR     | Vaginal  | NR | Total: 17.5%<br><b>6–8 weeks</b><br>Complete expulsion: 6/80 (7.5%)<br>Partial expulsion: 8/80 (10%)                                                 | NR                                                                               | NR                                                                                 |
| Sodje, 2016       | Prospective observational   | Nigeria   | Overall                                  | 374     | Copper | Both     | NR | At 6 weeks<br>24/374 (6.4%)                                                                                                                          | NR                                                                               | NR                                                                                 |
| Vishwakarma, 2020 | Non-randomized intervention | India     | Overall                                  | 1,029   | Copper | Cesarean | NR | At 6 weeks:<br>23/1,029 (2.2%)                                                                                                                       | 13/1,209 (1.2%)                                                                  | NR                                                                                 |
| Wasim, 2018       | Non-randomized intervention | Pakistan  | Overall                                  | 3,012   | Copper | Both     | NR | NR                                                                                                                                                   | Expulsion: 75 (6%)                                                               | NR                                                                                 |
| Weerasekera 2018  | Non-randomized intervention | Sri Lanka | Overall                                  | 184,433 | NR     | Both     | NR | 4–6 weeks                                                                                                                                            | NR                                                                               | NR                                                                                 |



|             |                                    |          |         |        |        |      |    |                                              |              |    |
|-------------|------------------------------------|----------|---------|--------|--------|------|----|----------------------------------------------|--------------|----|
|             |                                    |          |         |        |        |      |    | Spontaneous<br>expulsion:<br>68/2,328 (2.9%) |              |    |
| Yadav, 2020 | Retrospective                      | India    | Overall | 20,418 | Copper | Both | NR | 264/3,753 (7.0%)                             | NR           | NR |
| Yadav, 2016 | Cross-sectional                    | India    | Overall | 28,688 | Copper | Both | NR | At 6 weeks:<br>792/28,688<br>(2.8%)          | NR           | NR |
| Zaman, 2020 | Non-<br>randomized<br>intervention | Pakistan | Overall | 140    | Copper | NR   | NR | NR                                           | 7/122 (5.7%) | NR |

Key: CD – cesarean delivery; h – hour; IUD – intrauterine device; min – minute; mos – months; NR – not reported; PPIUD – postpartum intrauterine device; RCT – randomized controlled trial; VD – vaginal delivery.
